# Supplementary material for: Bimetallic nanoparticles and biochar produced by Adansonia Digitata shell and their effect against tomato pathogenic fungi
Source: PeerJ. 2024 Mar 1;12:e17023. doi: 10.7717/peerj.17023 (PMC10911075; doi:10.7717/peerj.17023)
Supplement: Supplemental Information 1 [file peerj-12-17023-s001.xlsx]

## Sheet: Sheet1
plant extract		AgNPs		FeONPs		Ag-FeONPs		Biochar (BC)
4000	99.6114	4000	98.9805	4000	99.8457	4000	100.162	4000	98.8236
3999	99.5838	3999	98.9523	3999	99.8141	3999	100.117	3999	98.8157
3998	99.5695	3998	98.9242	3998	99.7977	3998	100.049	3998	98.8064
3997	99.5759	3997	98.8828	3997	99.795	3997	99.9886	3997	98.7939
3996	99.5998	3996	98.8488	3996	99.8284	3996	99.9631	3996	98.7803
3995	99.6271	3995	98.8406	3995	99.8641	3995	99.9789	3995	98.7697
3994	99.6515	3994	98.8602	3994	99.8793	3994	100.02	3994	98.7694
3993	99.6758	3993	98.8891	3993	99.8684	3993	100.063	3993	98.788
3992	99.6997	3992	98.901	3992	99.8416	3992	100.091	3992	98.8269
3991	99.7128	3991	98.8854	3991	99.8137	3991	100.091	3991	98.8734
3990	99.7018	3990	98.8612	3990	99.7947	3990	100.061	3990	98.9032
3989	99.6621	3989	98.86	3989	99.7853	3989	100.015	3989	98.8934
3988	99.6041	3988	98.8937	3988	99.7778	3988	99.9722	3988	98.8399
3987	99.5503	3987	98.942	3987	99.7656	3987	99.9433	3987	98.7675
3986	99.5227	3986	98.9725	3986	99.7513	3986	99.927	3986	98.7155
3985	99.5296	3985	98.969	3985	99.7445	3985	99.9174	3985	98.708
3984	99.5626	3984	98.9416	3984	99.7503	3984	99.9081	3984	98.7351
3983	99.6064	3983	98.9155	3983	99.7642	3983	99.8952	3983	98.7669
3982	99.6481	3982	98.9106	3982	99.7775	3982	99.8832	3982	98.784
3981	99.6767	3981	98.9299	3981	99.7851	3981	99.8821	3981	98.7887
3980	99.6839	3980	98.964	3980	99.7892	3980	99.8966	3980	98.7895
3979	99.6719	3979	99.0031	3979	99.796	3979	99.9208	3979	98.7832
3978	99.6552	3978	99.043	3978	99.8086	3978	99.9487	3978	98.7558
3977	99.6466	3977	99.0779	3977	99.8183	3977	99.9826	3977	98.6977
3976	99.6418	3976	99.0953	3976	99.8077	3976	100.024	3976	98.6182
3975	99.6238	3975	99.0848	3975	99.7674	3975	100.062	3975	98.5445
3974	99.5808	3974	99.0499	3974	99.7103	3974	100.081	3974	98.5057
3973	99.5165	3973	99.0064	3973	99.6641	3973	100.075	3973	98.512
3972	99.4492	3972	98.9694	3972	99.6505	3972	100.054	3972	98.5463
3971	99.4044	3971	98.9465	3971	99.6724	3971	100.033	3971	98.5793
3970	99.4011	3970	98.94	3970	99.717	3970	100.022	3970	98.5925
3969	99.4336	3969	98.9491	3969	99.7631	3969	100.014	3969	98.5863
3968	99.472	3968	98.9682	3968	99.7891	3968	99.9902	3968	98.5718
3967	99.4907	3967	98.9862	3967	99.787	3967	99.9437	3967	98.5582
3966	99.4926	3966	98.9921	3966	99.7703	3966	99.8995	3966	98.5509
3965	99.4985	3965	98.9785	3965	99.7636	3965	99.9005	3965	98.5549
3964	99.5142	3964	98.944	3964	99.7773	3964	99.9603	3964	98.5755
3963	99.5189	3963	98.8954	3963	99.7971	3963	100.039	3963	98.6126
3962	99.4889	3962	98.8471	3962	99.797	3962	100.074	3962	98.6547
3961	99.4267	3961	98.8117	3961	99.7652	3961	100.042	3961	98.6822
3960	99.364	3960	98.7935	3960	99.7151	3960	99.9718	3960	98.6851
3959	99.3362	3959	98.7902	3959	99.6749	3959	99.9125	3959	98.6768
3958	99.3537	3958	98.7993	3958	99.6659	3958	99.8901	3958	98.6861
3957	99.3964	3957	98.8179	3957	99.6864	3957	99.8965	3957	98.7282
3956	99.438	3956	98.8396	3956	99.7145	3956	99.905	3956	98.7872
3955	99.4753	3955	98.8573	3955	99.7263	3955	99.8982	3955	98.8266
3954	99.5248	3954	98.8708	3954	99.7129	3954	99.8823	3954	98.8171
3953	99.5909	3953	98.8889	3953	99.68	3953	99.876	3953	98.7523
3952	99.6486	3952	98.9247	3952	99.6408	3952	99.8866	3952	98.6514
3951	99.6651	3951	98.9879	3951	99.6109	3951	99.9024	3951	98.5526
3950	99.6335	3950	99.0755	3950	99.6047	3950	99.9092	3950	98.4978
3949	99.5776	3949	99.1652	3949	99.6245	3949	99.9088	3949	98.5055
3948	99.5248	3948	99.2213	3948	99.6552	3948	99.9136	3948	98.5558
3947	99.4834	3947	99.2207	3947	99.6784	3947	99.9321	3947	98.6099
3946	99.4484	3946	99.174	3946	99.688	3946	99.9641	3946	98.6439
3945	99.4215	3945	99.1199	3945	99.6882	3945	100.003	3945	98.6579
3944	99.4158	3944	99.098	3944	99.6804	3944	100.035	3944	98.6623
3943	99.4404	3943	99.1207	3943	99.6644	3943	100.044	3943	98.6642
3942	99.4873	3942	99.165	3942	99.6478	3942	100.03	3942	98.6674
3941	99.5323	3941	99.1895	3941	99.6465	3941	100.006	3941	98.6758
3940	99.5567	3940	99.1672	3940	99.6698	3940	99.984	3940	98.691
3939	99.5651	3939	99.1028	3939	99.7133	3939	99.9685	3939	98.7067
3938	99.5791	3938	99.0228	3938	99.7633	3938	99.9649	3938	98.711
3937	99.6112	3937	98.9537	3937	99.8052	3937	99.9814	3937	98.695
3936	99.6499	3936	98.9127	3936	99.8252	3936	100.02	3936	98.6611
3935	99.6779	3935	98.9128	3935	99.8142	3935	100.069	3935	98.6218
3934	99.6928	3934	98.9606	3934	99.776	3934	100.114	3934	98.5901
3933	99.7015	3933	99.04	3933	99.7307	3933	100.146	3933	98.5694
3932	99.7038	3932	99.1053	3932	99.7036	3932	100.16	3932	98.5526
3931	99.6927	3931	99.1111	3931	99.7057	3931	100.154	3931	98.531
3930	99.6701	3930	99.0525	3930	99.7263	3930	100.132	3930	98.5038
3929	99.6439	3929	98.9644	3929	99.7416	3929	100.106	3929	98.4782
3928	99.6154	3928	98.8866	3928	99.7349	3928	100.083	3928	98.4642
3927	99.5862	3927	98.8358	3927	99.7132	3927	100.061	3927	98.4709
3926	99.5696	3926	98.808	3926	99.6999	3926	100.047	3926	98.5037
3925	99.5749	3925	98.7952	3925	99.7081	3925	100.049	3925	98.5565
3924	99.5826	3924	98.7957	3924	99.7224	3924	100.064	3924	98.6083
3923	99.5639	3923	98.8132	3923	99.7165	3923	100.073	3923	98.6358
3922	99.5229	3922	98.8515	3922	99.684	3922	100.063	3922	98.6307
3921	99.494	3921	98.9077	3921	99.6427	3921	100.045	3921	98.6017
3920	99.4942	3920	98.9671	3920	99.6139	3920	100.03	3920	98.567
3919	99.5021	3919	99.0136	3919	99.6041	3919	100.007	3919	98.545
3918	99.491	3918	99.0423	3918	99.6034	3918	99.9643	3918	98.5476
3917	99.4616	3917	99.0579	3917	99.597	3917	99.9122	3917	98.5744
3916	99.4314	3916	99.0597	3916	99.5758	3916	99.8791	3916	98.6144
3915	99.4133	3915	99.0389	3915	99.5435	3915	99.8758	3915	98.6566
3914	99.42	3914	98.9924	3914	99.5171	3914	99.8914	3914	98.6968
3913	99.4599	3913	98.9321	3913	99.5151	3913	99.9134	3913	98.7328
3912	99.52	3912	98.878	3912	99.5434	3912	99.9343	3912	98.7585
3911	99.5639	3911	98.8458	3911	99.5906	3911	99.9496	3911	98.7679
3910	99.5626	3910	98.8379	3910	99.6365	3910	99.9597	3910	98.7604
3909	99.5206	3909	98.8444	3909	99.6646	3909	99.9748	3909	98.7397
3908	99.4655	3908	98.8555	3908	99.6645	3908	100.003	3908	98.7052
3907	99.4258	3907	98.8766	3907	99.6316	3907	100.037	3907	98.6511
3906	99.4162	3906	98.9293	3906	99.568	3906	100.059	3906	98.5764
3905	99.4321	3905	99.0293	3905	99.4849	3905	100.056	3905	98.4987
3904	99.4445	3904	99.1562	3904	99.4014	3904	100.043	3904	98.4517
3903	99.4164	3903	99.2568	3903	99.3408	3903	100.04	3903	98.4632
3902	99.3453	3902	99.2874	3902	99.3281	3902	100.05	3902	98.5319
3901	99.281	3901	99.2459	3901	99.3776	3901	100.061	3901	98.625
3900	99.2824	3900	99.1599	3900	99.4783	3900	100.056	3900	98.7007
3899	99.3561	3899	99.0595	3899	99.5985	3899	100.036	3899	98.7373
3898	99.4552	3898	98.9659	3898	99.7064	3898	100.012	3898	98.7366
3897	99.5294	3897	98.8944	3897	99.7819	3897	99.9966	3897	98.7054
3896	99.5623	3896	98.8579	3896	99.8179	3896	99.9959	3896	98.647
3895	99.5589	3895	98.8649	3895	99.8182	3895	100.003	3895	98.5683
3894	99.5252	3894	98.914	3894	99.7934	3894	100.001	3894	98.4872
3893	99.4694	3893	98.989	3893	99.7517	3893	99.9796	3893	98.4241
3892	99.4209	3892	99.0556	3892	99.6935	3892	99.9475	3892	98.3838
3891	99.4129	3891	99.0749	3891	99.6212	3891	99.9345	3891	98.3545
3890	99.4289	3890	99.0309	3890	99.5505	3890	99.9479	3890	98.3354
3889	99.4173	3889	98.9444	3889	99.4992	3889	99.9644	3889	98.3479
3888	99.3683	3888	98.8623	3888	99.4725	3888	99.9688	3888	98.4061
3887	99.3491	3887	98.8327	3887	99.4625	3887	99.9685	3887	98.4883
3886	99.433	3886	98.8796	3886	99.4579	3886	99.9812	3886	98.5517
3885	99.5781	3885	98.9818	3885	99.4496	3885	100.01	3885	98.5757
3884	99.6445	3884	99.0834	3884	99.431	3884	100.025	3884	98.5796
3883	99.5551	3883	99.1393	3883	99.4014	3883	99.9872	3883	98.5979
3882	99.3842	3882	99.1419	3882	99.3739	3882	99.9074	3882	98.65
3881	99.2759	3881	99.1111	3881	99.3637	3881	99.8359	3881	98.7248
3880	99.2926	3880	99.0676	3880	99.3655	3880	99.8133	3880	98.7858
3879	99.3597	3879	99.0169	3879	99.3594	3879	99.8249	3879	98.7988
3878	99.3668	3878	98.9632	3878	99.3373	3878	99.8213	3878	98.7526
3877	99.2922	3877	98.9271	3877	99.3139	3877	99.7869	3877	98.6545
3876	99.2237	3876	98.9298	3876	99.3137	3876	99.754	3876	98.5289
3875	99.2717	3875	98.9721	3875	99.3467	3875	99.7651	3875	98.4186
3874	99.4385	3874	99.0306	3874	99.3934	3874	99.8358	3874	98.365
3873	99.5898	3873	99.0686	3873	99.4183	3873	99.9299	3873	98.3761
3872	99.5949	3872	99.0555	3872	99.3974	3872	99.9717	3872	98.4248
3871	99.4805	3871	98.9906	3871	99.338	3871	99.9129	3871	98.479
3870	99.3967	3870	98.9069	3870	99.2745	3870	99.7985	3870	98.5307
3869	99.4085	3869	98.8401	3869	99.2395	3869	99.7262	3869	98.5835
3868	99.4308	3868	98.8025	3868	99.2408	3868	99.7287	3868	98.6253
3867	99.3995	3867	98.7988	3867	99.2735	3867	99.7767	3867	98.6291
3866	99.3723	3866	98.8324	3866	99.3364	3866	99.8504	3866	98.5812
3865	99.4171	3865	98.8874	3865	99.4202	3865	99.9338	3865	98.5106
3864	99.4965	3864	98.9243	3864	99.4917	3864	99.9877	3864	98.4727
3863	99.5239	3863	98.9092	3863	99.5107	3863	99.9755	3863	98.4963
3862	99.4909	3862	98.8468	3862	99.4714	3862	99.9067	3862	98.5623
3861	99.4565	3861	98.7752	3861	99.4036	3861	99.8335	3861	98.63
3860	99.4611	3860	98.7305	3860	99.3361	3860	99.7948	3860	98.6668
3859	99.4995	3859	98.7227	3859	99.2728	3859	99.7846	3859	98.6597
3858	99.5408	3858	98.7395	3858	99.2024	3858	99.7711	3858	98.6172
3857	99.5503	3857	98.7622	3857	99.1234	3857	99.7373	3857	98.5648
3856	99.51	3856	98.7811	3856	99.056	3856	99.6964	3856	98.5149
3855	99.47	3855	98.804	3855	99.0305	3855	99.6716	3855	98.4697
3854	99.5299	3854	98.8479	3854	99.0656	3854	99.675	3854	98.467
3853	99.6538	3853	98.9044	3853	99.1307	3853	99.7159	3853	98.53
3852	99.6773	3852	98.934	3852	99.1904	3852	99.7676	3852	98.6036
3851	99.56	3851	98.9215	3851	99.2566	3851	99.7893	3851	98.6207
3850	99.4152	3850	98.8932	3850	99.3436	3850	99.7981	3850	98.5711
3849	99.3527	3849	98.8725	3849	99.445	3849	99.8338	3849	98.4888
3848	99.3908	3848	98.8559	3848	99.545	3848	99.8996	3848	98.4177
3847	99.4769	3847	98.8251	3847	99.6239	3847	99.9629	3847	98.3889
3846	99.5512	3846	98.7691	3846	99.6632	3846	99.9958	3846	98.4076
3845	99.5828	3845	98.7006	3845	99.6591	3845	100.006	3845	98.4525
3844	99.5775	3844	98.6552	3844	99.6241	3844	100.024	3844	98.4907
3843	99.5562	3843	98.6666	3843	99.5734	3843	100.059	3843	98.5052
3842	99.5273	3842	98.7353	3842	99.516	3842	100.082	3842	98.5102
3841	99.4899	3841	98.8174	3841	99.4513	3841	100.058	3841	98.5348
3840	99.4563	3840	98.8477	3840	99.3746	3840	99.9915	3840	98.5905
3839	99.4485	3839	98.792	3839	99.2927	3839	99.932	3839	98.6506
3838	99.4675	3838	98.6873	3838	99.2251	3838	99.9169	3838	98.663
3837	99.4822	3837	98.6111	3837	99.1861	3837	99.9276	3837	98.5965
3836	99.4498	3836	98.6098	3836	99.1669	3836	99.9062	3836	98.4683
3835	99.3543	3835	98.6667	3835	99.149	3835	99.8178	3835	98.3307
3834	99.2253	3834	98.7246	3834	99.1326	3834	99.6875	3834	98.2407
3833	99.1226	3833	98.7327	3833	99.1372	3833	99.5819	3833	98.2305
3832	99.0892	3832	98.6824	3832	99.1759	3832	99.5565	3832	98.2892
3831	99.109	3831	98.609	3831	99.2407	3831	99.6158	3831	98.3748
3830	99.1227	3830	98.5579	3830	99.3093	3830	99.7143	3830	98.4464
3829	99.0895	3829	98.5504	3829	99.3607	3829	99.796	3829	98.485
3828	99.0364	3828	98.5774	3828	99.3836	3828	99.8305	3828	98.4926
3827	99.0358	3827	98.6196	3827	99.3729	3827	99.8266	3827	98.4829
3826	99.1181	3826	98.668	3826	99.3283	3826	99.8146	3826	98.4753
3825	99.2197	3825	98.7233	3825	99.2551	3825	99.8079	3825	98.4904
3824	99.2471	3824	98.7787	3824	99.1646	3824	99.7854	3824	98.5338
3823	99.1855	3823	98.8114	3823	99.075	3823	99.7143	3823	98.5843
3822	99.1279	3822	98.7997	3822	99.0091	3822	99.5876	3822	98.6107
3821	99.1612	3821	98.7534	3821	98.9736	3821	99.4635	3821	98.5896
3820	99.2332	3820	98.705	3820	98.9534	3820	99.4033	3820	98.5211
3819	99.2304	3819	98.6706	3819	98.9362	3819	99.3759	3819	98.4391
3818	99.1393	3818	98.6441	3818	98.9267	3818	99.3357	3818	98.3937
3817	99.0659	3817	98.6176	3817	98.9333	3817	99.2997	3817	98.4146
3816	99.1038	3816	98.5967	3816	98.9556	3816	99.3196	3816	98.4806
3815	99.2025	3815	98.592	3815	98.9902	3815	99.4106	3815	98.5383
3814	99.2447	3814	98.5996	3814	99.0329	3814	99.5197	3814	98.5541
3813	99.2148	3813	98.5984	3813	99.0742	3813	99.5935	3813	98.5311
3812	99.1912	3812	98.5664	3812	99.1043	3812	99.6343	3812	98.4905
3811	99.2145	3811	98.4979	3811	99.1201	3811	99.665	3811	98.4558
3810	99.2327	3810	98.4087	3810	99.1239	3810	99.6826	3810	98.4437
3809	99.1776	3809	98.3267	3809	99.1188	3809	99.6604	3809	98.4567
3808	99.0765	3808	98.2796	3808	99.1029	3808	99.5885	3808	98.4839
3807	99.0284	3807	98.2866	3807	99.0662	3807	99.5024	3807	98.5097
3806	99.0529	3806	98.3516	3806	99.0015	3806	99.4416	3806	98.5255
3805	99.0544	3805	98.4616	3805	98.9117	3805	99.3888	3805	98.5288
3804	98.9668	3804	98.5832	3804	98.8146	3804	99.3057	3804	98.5069
3803	98.8581	3803	98.6643	3803	98.7444	3803	99.2001	3803	98.4459
3802	98.8683	3802	98.6626	3802	98.7316	3802	99.1341	3802	98.3611
3801	99.0144	3801	98.5868	3801	98.7749	3801	99.1774	3801	98.2892
3800	99.1339	3800	98.4866	3800	98.8481	3800	99.3052	3800	98.2471
3799	99.1032	3799	98.4067	3799	98.9259	3799	99.4111	3799	98.2162
3798	98.9746	3798	98.3662	3798	98.9948	3798	99.4375	3798	98.1685
3797	98.8772	3797	98.3629	3797	99.0419	3797	99.4057	3797	98.1063
3796	98.8605	3796	98.3806	3796	99.0498	3796	99.3601	3796	98.0681
3795	98.8687	3795	98.3962	3795	99.0161	3795	99.319	3795	98.0885
3794	98.8486	3794	98.3922	3794	98.9714	3794	99.2781	3794	98.1573
3793	98.824	3793	98.3644	3793	98.9627	3793	99.2439	3793	98.2235
3792	98.8475	3792	98.3214	3792	99.0161	3792	99.2354	3792	98.2355
3791	98.918	3791	98.2805	3791	99.1092	3791	99.2566	3791	98.1815
3790	98.9823	3790	98.2574	3790	99.1862	3790	99.2953	3790	98.0931
3789	98.9981	3789	98.2536	3789	99.2062	3789	99.3404	3789	98.0147
3788	98.9741	3788	98.2541	3788	99.1745	3788	99.3878	3788	97.9742
3787	98.9549	3787	98.242	3787	99.1315	3787	99.429	3787	97.977
3786	98.9809	3786	98.2195	3786	99.1151	3786	99.4517	3786	98.0131
3785	99.0505	3785	98.2108	3785	99.1303	3785	99.4516	3785	98.0625
3784	99.1155	3784	98.2403	3784	99.1536	3784	99.4351	3784	98.1037
3783	99.1177	3783	98.3091	3783	99.1624	3783	99.4054	3783	98.1238
3782	99.0481	3782	98.3908	3782	99.1513	3782	99.3613	3782	98.1184
3781	98.963	3781	98.4441	3781	99.1282	3781	99.3122	3781	98.0882
3780	98.9334	3780	98.4357	3780	99.1013	3780	99.2774	3780	98.0424
3779	98.9676	3779	98.3661	3779	99.0708	3779	99.2706	3779	97.9989
3778	99.0049	3778	98.2712	3778	99.0351	3778	99.2812	3778	97.975
3777	98.9913	3777	98.1919	3777	98.9997	3777	99.2853	3777	97.9742
3776	98.9351	3776	98.1478	3776	98.9725	3776	99.276	3776	97.9847
3775	98.8786	3775	98.1326	3775	98.9508	3775	99.2664	3775	97.9935
3774	98.8343	3774	98.1276	3774	98.9227	3774	99.2646	3774	97.9991
3773	98.7763	3773	98.1196	3773	98.8819	3773	99.2611	3773	98.0062
3772	98.7013	3772	98.1099	3772	98.8428	3772	99.2444	3772	98.0095
3771	98.6608	3771	98.1092	3771	98.8322	3771	99.2226	3771	97.9953
3770	98.6956	3770	98.1197	3770	98.8578	3770	99.2174	3770	97.9614
3769	98.7641	3769	98.1253	3769	98.8901	3769	99.2297	3769	97.9242
3768	98.788	3768	98.1085	3768	98.8927	3768	99.2232	3768	97.899
3767	98.754	3767	98.0786	3767	98.8666	3767	99.1686	3767	97.8805
3766	98.7229	3766	98.0703	3766	98.8445	3766	99.0866	3766	97.8514
3765	98.7394	3765	98.1105	3765	98.8471	3765	99.0288	3765	97.8075
3764	98.7697	3764	98.188	3764	98.8588	3764	99.0199	3764	97.7646
3763	98.7515	3763	98.2648	3763	98.8501	3763	99.0397	3763	97.7406
3762	98.6876	3762	98.3046	3762	98.8105	3762	99.0594	3762	97.7374
3761	98.6407	3761	98.2898	3761	98.7524	3761	99.0684	3761	97.7445
3760	98.6401	3760	98.2283	3760	98.692	3760	99.0622	3760	97.7555
3759	98.6426	3759	98.1492	3759	98.629	3759	99.0357	3759	97.7723
3758	98.6047	3758	98.0826	3758	98.5501	3758	98.9907	3758	97.7969
3757	98.5367	3757	98.0392	3757	98.451	3757	98.94	3757	97.8288
3756	98.4648	3756	98.0098	3756	98.3413	3756	98.8968	3756	97.8652
3755	98.403	3755	97.977	3755	98.2375	3755	98.8658	3755	97.8943
3754	98.3698	3754	97.9277	3754	98.1636	3754	98.8491	3754	97.8852
3753	98.3901	3753	97.864	3753	98.1463	3753	98.8451	3753	97.8057
3752	98.4452	3752	97.8054	3752	98.1878	3752	98.8301	3752	97.6753
3751	98.4631	3751	97.7704	3751	98.2352	3751	98.7705	3751	97.5682
3750	98.4094	3750	97.751	3750	98.223	3750	98.6739	3750	97.5325
3749	98.3166	3749	97.727	3749	98.1567	3749	98.5796	3749	97.5457
3748	98.1958	3748	97.6945	3748	98.0837	3748	98.5007	3748	97.5745
3747	98.039	3747	97.661	3747	98.0323	3747	98.4314	3747	97.6194
3746	97.9024	3746	97.6339	3746	98.0016	3746	98.3866	3746	97.673
3745	97.9187	3745	97.6247	3745	97.9799	3745	98.4051	3745	97.685
3744	98.1087	3744	97.6407	3744	97.9727	3744	98.5132	3744	97.6181
3743	98.2792	3743	97.6653	3743	97.9964	3743	98.6497	3743	97.504
3742	98.2949	3742	97.6797	3742	98.0426	3742	98.7189	3742	97.4049
3741	98.2313	3741	97.6872	3741	98.0795	3741	98.7137	3741	97.3548
3740	98.2043	3740	97.6996	3740	98.0892	3740	98.6886	3740	97.352
3739	98.2311	3739	97.7231	3739	98.0883	3739	98.6874	3739	97.3816
3738	98.254	3738	97.7535	3738	98.1052	3738	98.716	3738	97.4258
3737	98.2297	3737	97.7734	3737	98.1333	3737	98.7537	3737	97.4666
3736	98.1337	3736	97.7653	3736	98.1009	3736	98.7631	3736	97.4905
3735	97.9505	3735	97.7372	3735	97.9305	3735	98.6991	3735	97.483
3734	97.7504	3734	97.7139	3734	97.6745	3734	98.5586	3734	97.4214
3733	97.6828	3733	97.6979	3733	97.5038	3733	98.4144	3733	97.2931
3732	97.8114	3732	97.6687	3732	97.5259	3732	98.3578	3732	97.1189
3731	98.0267	3731	97.6128	3731	97.694	3731	98.4053	3731	96.9452
3730	98.1526	3730	97.535	3730	97.8886	3730	98.494	3730	96.8147
3729	98.1028	3729	97.4475	3729	98.0213	3729	98.551	3729	96.7418
3728	97.9328	3728	97.3643	3728	98.0634	3728	98.5461	3728	96.7055
3727	97.7677	3727	97.2975	3727	98.0228	3727	98.4909	3727	96.666
3726	97.6777	3726	97.2414	3726	97.9171	3726	98.4117	3726	96.6027
3725	97.6405	3725	97.1699	3725	97.7738	3725	98.3275	3725	96.5369
3724	97.6171	3724	97.07	3724	97.6394	3724	98.2499	3724	96.5088
3723	97.5926	3723	96.9697	3723	97.563	3723	98.1833	3723	96.5318
3722	97.5517	3722	96.912	3722	97.5563	3722	98.1115	3722	96.5723
3721	97.4694	3721	96.9063	3721	97.578	3721	98.0052	3721	96.5784
3720	97.3426	3720	96.9207	3720	97.5733	3720	97.856	3720	96.5248
3719	97.2096	3719	96.9166	3719	97.5221	3719	97.7005	3719	96.4286
3718	97.1192	3718	96.8749	3718	97.4385	3718	97.592	3718	96.3279
3717	97.0763	3717	96.7959	3717	97.3407	3717	97.5477	3717	96.255
3716	97.0312	3716	96.6882	3716	97.2289	3716	97.5288	3716	96.222
3715	96.9355	3715	96.5679	3715	97.0902	3715	97.4733	3715	96.2197
3714	96.801	3714	96.463	3714	96.9242	3714	97.3445	3714	96.2236
3713	96.6952	3713	96.4005	3713	96.7638	3713	97.1548	3713	96.2159
3712	96.6675	3712	96.3658	3712	96.6579	3712	96.9573	3712	96.1981
3711	96.6814	3711	96.2868	3711	96.6112	3711	96.809	3711	96.1588
3710	96.6533	3710	96.109	3710	96.5711	3710	96.7221	3710	96.0637
3709	96.5503	3709	95.875	3709	96.4991	3709	96.6672	3709	95.9034
3708	96.4109	3708	95.6861	3708	96.4098	3708	96.6141	3708	95.7162
3707	96.2889	3707	95.608	3707	96.3372	3707	96.549	3707	95.5513
3706	96.1988	3706	95.6314	3706	96.2888	3706	96.4691	3706	95.4268
3705	96.1123	3705	95.6917	3705	96.234	3705	96.3722	3705	95.3251
3704	95.9941	3704	95.7121	3704	96.1305	3704	96.2591	3704	95.22
3703	95.8403	3703	95.6457	3703	95.9635	3703	96.1388	3703	95.108
3702	95.6872	3702	95.5009	3702	95.7645	3702	96.0301	3702	95.0078
3701	95.5779	3701	95.3226	3701	95.5834	3701	95.9486	3701	94.926
3700	95.5129	3700	95.1436	3700	95.4467	3700	95.8852	3700	94.8419
3699	95.4518	3699	94.9689	3699	95.3513	3699	95.8114	3699	94.7327
3698	95.3646	3698	94.7991	3698	95.2828	3698	95.71	3698	94.5948
3697	95.2515	3697	94.6449	3697	95.2271	3697	95.5898	3697	94.4407
3696	95.1172	3696	94.5123	3696	95.1704	3696	95.4743	3696	94.2854
3695	94.957	3695	94.3839	3695	95.0939	3695	95.3781	3695	94.1421
3694	94.7826	3694	94.2266	3694	94.9744	3694	95.2908	3694	94.0223
3693	94.6256	3693	94.0214	3693	94.7933	3693	95.1763	3693	93.9275
3692	94.4959	3692	93.7867	3692	94.5445	3692	94.98	3692	93.8348
3691	94.3466	3691	93.5689	3691	94.2373	3691	94.6557	3691	93.7016
3690	94.1143	3690	93.4006	3690	93.8925	3690	94.221	3690	93.4974
3689	93.8046	3689	93.2619	3689	93.5418	3689	93.7837	3689	93.2366
3688	93.4869	3688	93.1016	3688	93.2272	3688	93.4549	3688	92.9724
3687	93.1994	3687	92.895	3687	92.9818	3687	93.2449	3687	92.7412
3686	92.9351	3686	92.6592	3686	92.8086	3686	93.0973	3686	92.5336
3685	92.7036	3685	92.4253	3685	92.6871	3685	92.9709	3685	92.3189
3684	92.5254	3684	92.2146	3684	92.5856	3684	92.8525	3684	92.0759
3683	92.3843	3683	92.0265	3683	92.4658	3683	92.7262	3683	91.803
3682	92.2292	3682	91.8399	3682	92.2932	3682	92.5648	3682	91.5134
3681	92.039	3681	91.6337	3681	92.0579	3681	92.3589	3681	91.2305
3680	91.8405	3680	91.4077	3680	91.7808	3680	92.1399	3680	90.9808
3679	91.6385	3679	91.1751	3679	91.4941	3679	91.9409	3679	90.7762
3678	91.3845	3678	90.9324	3678	91.2147	3678	91.7386	3678	90.5871
3677	91.0563	3677	90.6502	3677	90.9329	3677	91.4474	3677	90.3542
3676	90.7346	3676	90.3178	3676	90.6321	3676	91.0282	3676	90.0562
3675	90.5	3675	89.9775	3675	90.3154	3675	90.603	3675	89.7434
3674	90.2973	3674	89.6545	3674	90.0009	3674	90.2921	3674	89.4697
3673	90.0114	3673	89.3015	3673	89.692	3673	90.0533	3673	89.2209
3672	89.6194	3672	88.8517	3672	89.3787	3672	89.7942	3672	88.9261
3671	89.2017	3671	88.3115	3671	89.0477	3671	89.4524	3671	88.5337
3670	88.831	3670	87.8047	3670	88.6875	3670	89.0231	3670	88.0871
3669	88.4837	3669	87.4592	3669	88.3036	3669	88.566	3669	87.6879
3668	88.1058	3668	87.2702	3668	87.9247	3668	88.1258	3668	87.383
3667	87.705	3667	87.1414	3667	87.5843	3667	87.7171	3667	87.1336
3666	87.3285	3666	86.9861	3666	87.2928	3666	87.3606	3666	86.8729
3665	87.0016	3665	86.7652	3665	87.0299	3665	87.0718	3665	86.5651
3664	86.7116	3664	86.479	3664	86.7668	3664	86.8436	3664	86.2211
3663	86.4399	3663	86.1475	3663	86.4931	3663	86.6535	3663	85.8747
3662	86.1864	3662	85.7956	3662	86.2167	3662	86.4743	3662	85.5505
3661	85.9527	3661	85.4482	3661	85.9404	3661	86.2762	3661	85.2508
3660	85.7039	3660	85.123	3660	85.6464	3660	86.0255	3660	84.9618
3659	85.3766	3659	84.8206	3659	85.3072	3659	85.6903	3659	84.6633
3658	84.9444	3658	84.5235	3658	84.9142	3658	85.2659	3658	84.339
3657	84.479	3657	84.2121	3657	84.4968	3657	84.8035	3657	83.9962
3656	84.1012	3656	83.8847	3656	84.1095	3656	84.3969	3656	83.6711
3655	83.8456	3655	83.5516	3655	83.7843	3655	84.0926	3655	83.3977
3654	83.6406	3654	83.2144	3654	83.5038	3654	83.8441	3654	83.1774
3653	83.4079	3653	82.8614	3653	83.2145	3653	83.5717	3653	82.9811
3652	83.1267	3652	82.4814	3652	82.8549	3652	83.231	3652	82.7587
3651	82.8063	3651	82.0862	3651	82.3916	3651	82.8367	3651	82.4626
3650	82.4269	3650	81.7165	3650	81.8639	3650	82.448	3650	82.0742
3649	81.9618	3649	81.4047	3649	81.3864	3649	82.1086	3649	81.6041
3648	81.4743	3648	81.1352	3648	81.0623	3648	81.7985	3648	81.1062
3647	81.0799	3647	80.8665	3647	80.8842	3647	81.4874	3647	80.6643
3646	80.8113	3646	80.5739	3646	80.7586	3646	81.175	3646	80.3176
3645	80.61	3645	80.2537	3645	80.6068	3645	80.8689	3645	80.0356
3644	80.4053	3644	79.9101	3644	80.4087	3644	80.5702	3644	79.763
3643	80.1587	3643	79.5529	3643	80.1757	3643	80.2722	3643	79.4668
3642	79.8621	3642	79.1997	3642	79.9136	3642	79.9531	3642	79.1524
3641	79.529	3641	78.8732	3641	79.6162	3641	79.587	3641	78.848
3640	79.1963	3640	78.5942	3640	79.2868	3640	79.1782	3640	78.5742
3639	78.9158	3639	78.3704	3639	78.9542	3639	78.7831	3639	78.3259
3638	78.7098	3638	78.1815	3638	78.6565	3638	78.4781	3638	78.0771
3637	78.5381	3637	77.9801	3637	78.4075	3637	78.2887	3637	77.7974
3636	78.3368	3636	77.7235	3636	78.1857	3636	78.1641	3636	77.4723
3635	78.09	3635	77.4154	3635	77.9538	3635	78.0246	3635	77.1204
3634	77.8375	3634	77.1068	3634	77.6877	3634	77.8289	3634	76.7933
3633	77.604	3633	76.8396	3633	77.3869	3633	77.5853	3633	76.5449
3632	77.3543	3632	76.5954	3632	77.0638	3632	77.311	3632	76.3835
3631	77.0317	3631	76.3098	3631	76.7349	3631	77.0094	3631	76.2372
3630	76.6321	3630	75.9533	3630	76.4198	3630	76.6845	3630	75.9902
3629	76.2252	3629	75.6038	3629	76.1321	3629	76.3766	3629	75.6122
3628	75.8812	3628	75.3627	3628	75.866	3628	76.1373	3628	75.2181
3627	75.6044	3627	75.2107	3627	75.6101	3627	75.9432	3627	74.9273
3626	75.3672	3626	75.0651	3626	75.3617	3626	75.7378	3626	74.7462
3625	75.1553	3625	74.8873	3625	75.1249	3625	75.5107	3625	74.6156
3624	74.9577	3624	74.6825	3624	74.9049	3624	75.28	3624	74.4849
3623	74.7542	3623	74.4642	3623	74.7001	3623	75.0522	3623	74.3326
3622	74.5301	3622	74.2312	3622	74.4999	3622	74.8184	3622	74.1461
3621	74.295	3621	73.968	3621	74.2893	3621	74.5733	3621	73.9053
3620	74.0605	3620	73.6687	3620	74.0555	3620	74.3263	3620	73.6016
3619	73.8098	3619	73.3607	3619	73.7916	3619	74.0859	3619	73.2692
3618	73.5218	3618	73.092	3618	73.5044	3618	73.8424	3618	72.9678
3617	73.2104	3617	72.8905	3617	73.2188	3617	73.5824	3617	72.7292
3616	72.9153	3616	72.7412	3616	72.9627	3616	73.3183	3616	72.5363
3615	72.6665	3615	72.5921	3615	72.7453	3615	73.0744	3615	72.3492
3614	72.4583	3614	72.3894	3614	72.5459	3614	72.8526	3614	72.1424
3613	72.2526	3613	72.1237	3613	72.3286	3613	72.6304	3613	71.9184
3612	72.0059	3612	71.8327	3612	72.0706	3612	72.387	3612	71.6876
3611	71.6993	3611	71.5564	3611	71.7767	3611	72.1167	3611	71.4422
3610	71.3599	3610	71.3026	3610	71.4724	3610	71.8205	3610	71.1624
3609	71.0531	3609	71.0539	3609	71.1892	3609	71.5011	3609	70.8533
3608	70.8324	3608	70.799	3608	70.9506	3608	71.178	3608	70.5589
3607	70.6939	3607	70.5482	3607	70.7596	3607	70.8941	3607	70.3197
3606	70.5882	3606	70.3201	3606	70.6008	3606	70.6857	3606	70.1302
3605	70.4662	3605	70.123	3605	70.4522	3605	70.554	3605	69.9528
3604	70.297	3604	69.9452	3604	70.2895	3604	70.4605	3604	69.7537
3603	70.0644	3603	69.7585	3603	70.0895	3603	70.3397	3603	69.5263
3602	69.7712	3602	69.5381	3602	69.8406	3602	70.1331	3602	69.2914
3601	69.4554	3601	69.2857	3601	69.5565	3601	69.835	3601	69.081
3600	69.1765	3600	69.0231	3600	69.2743	3600	69.5048	3600	68.9107
3599	68.9752	3599	68.764	3599	69.0294	3599	69.2159	3599	68.7622
3598	68.8435	3598	68.5036	3598	68.8254	3598	68.9882	3598	68.5951
3597	68.7314	3597	68.2429	3597	68.6347	3597	68.7769	3597	68.3782
3596	68.5809	3596	68.0089	3596	68.4247	3596	68.5256	3596	68.1123
3595	68.3659	3595	67.8299	3595	68.186	3595	68.2297	3595	67.8272
3594	68.1086	3594	67.6948	3594	67.9375	3594	67.9436	3594	67.5602
3593	67.8532	3593	67.5564	3593	67.7032	3593	67.7198	3593	67.3338
3592	67.6206	3592	67.3755	3592	67.4825	3592	67.5553	3592	67.1464
3591	67.384	3591	67.1445	3591	67.2483	3591	67.398	3591	66.9675
3590	67.0875	3590	66.8712	3590	66.9691	3590	67.1859	3590	66.7419
3589	66.6971	3589	66.5624	3589	66.6435	3589	66.8898	3589	66.4286
3588	66.2565	3588	66.2338	3588	66.318	3588	66.5462	3588	66.0644
3587	65.8815	3587	65.9155	3587	66.0523	3587	66.2363	3587	65.7494
3586	65.6589	3586	65.6296	3586	65.86	3586	66.0027	3586	65.5367
3585	65.5679	3585	65.3811	3585	65.7051	3585	65.8227	3585	65.3848
3584	65.5169	3584	65.1683	3584	65.5475	3584	65.6652	3584	65.2294
3583	65.4234	3583	64.9785	3583	65.3756	3583	65.5235	3583	65.0475
3582	65.2583	3582	64.7827	3582	65.2039	3582	65.3933	3582	64.8492
3581	65.044	3581	64.5528	3581	65.0485	3581	65.247	3581	64.6402
3580	64.8196	3580	64.2878	3580	64.9034	3580	65.0416	3580	64.4103
3579	64.6025	3579	64.0169	3579	64.7364	3579	64.7543	3579	64.1552
3578	64.3831	3578	63.7733	3578	64.5138	3578	64.4128	3578	63.8937
3577	64.1489	3577	63.5657	3577	64.2348	3577	64.0884	3577	63.6541
3576	63.904	3576	63.3785	3576	63.9413	3576	63.8459	3576	63.4451
3575	63.6594	3575	63.1935	3575	63.689	3575	63.6923	3575	63.2473
3574	63.4174	3574	63.0039	3574	63.5015	3574	63.5715	3574	63.0323
3573	63.1752	3573	62.8117	3573	63.3482	3573	63.4155	3573	62.7885
3572	62.936	3572	62.6217	3572	63.1647	3572	63.1976	3572	62.5282
3571	62.7036	3571	62.439	3571	62.8949	3571	62.935	3571	62.2726
3570	62.4679	3570	62.2622	3570	62.5265	3570	62.6545	3570	62.0312
3569	62.2079	3569	62.0733	3569	62.1056	3569	62.3686	3569	61.793
3568	61.9142	3568	61.8454	3568	61.7226	3568	62.088	3568	61.5432
3567	61.6108	3567	61.5798	3567	61.4517	3567	61.838	3567	61.2839
3566	61.3402	3566	61.3153	3566	61.2844	3566	61.6359	3566	61.0305
3565	61.1153	3565	61.0789	3565	61.1486	3565	61.4636	3565	60.7911
3564	60.911	3564	60.8545	3564	60.9817	3564	61.2884	3564	60.5595
3563	60.7032	3563	60.6083	3563	60.7705	3563	61.0966	3563	60.326
3562	60.492	3562	60.3287	3562	60.5401	3562	60.8908	3562	60.0871
3561	60.2868	3561	60.0404	3561	60.3205	3561	60.6731	3561	59.8492
3560	60.0833	3560	59.7767	3560	60.1184	3560	60.4411	3560	59.6256
3559	59.8622	3559	59.5432	3559	59.9209	3559	60.1979	3559	59.4254
3558	59.6128	3558	59.315	3558	59.7213	3558	59.9549	3558	59.2429
3557	59.3471	3557	59.0696	3557	59.5277	3557	59.7216	3557	59.0557
3556	59.0853	3556	58.8123	3556	59.342	3556	59.4944	3556	58.8348
3555	58.832	3555	58.5699	3555	59.1442	3555	59.2595	3555	58.5608
3554	58.5807	3554	58.3676	3554	58.9102	3554	59.0077	3554	58.2403
3553	58.3387	3553	58.2102	3553	58.643	3553	58.7476	3553	57.9119
3552	58.1319	3552	58.079	3552	58.3699	3552	58.4982	3552	57.6274
3551	57.9696	3551	57.9411	3551	58.1064	3551	58.2665	3551	57.4157
3550	57.8187	3550	57.7667	3550	57.8453	3550	58.0409	3550	57.2666
3549	57.625	3549	57.5429	3549	57.5842	3549	57.8103	3549	57.1452
3548	57.3621	3548	57.2784	3548	57.3414	3548	57.5784	3548	57.0141
3547	57.0568	3547	56.9975	3547	57.1334	3547	57.3503	3547	56.8439
3546	56.7666	3546	56.7242	3546	56.9435	3546	57.1138	3546	56.6158
3545	56.5277	3545	56.4662	3545	56.7381	3545	56.8518	3545	56.3296
3544	56.3286	3544	56.2168	3544	56.5096	3544	56.5738	3544	56.0141
3543	56.1379	3543	55.9708	3543	56.2813	3543	56.3142	3543	55.7177
3542	55.9423	3542	55.7296	3542	56.0719	3542	56.0924	3542	55.4757
3541	55.7459	3541	55.4942	3541	55.8726	3541	55.893	3541	55.2856
3540	55.5451	3540	55.2633	3540	55.6607	3540	55.6842	3540	55.1138
3539	55.3212	3539	55.0397	3539	55.4277	3539	55.4499	3539	54.9248
3538	55.0642	3538	54.8331	3538	55.1888	3538	55.2014	3538	54.7059
3537	54.7982	3537	54.6482	3537	54.97	3537	54.9674	3537	54.4696
3536	54.5659	3536	54.4688	3536	54.7822	3536	54.7716	3536	54.237
3535	54.3842	3535	54.2621	3535	54.6067	3535	54.6134	3535	54.0155
3534	54.2274	3534	54.0074	3534	54.4074	3534	54.4655	3534	53.7942
3533	54.0571	3533	53.7181	3533	54.1566	3533	54.2945	3533	53.5591
3532	53.8563	3532	53.4327	3532	53.8543	3532	54.086	3532	53.3145
3531	53.6332	3531	53.1832	3531	53.531	3531	53.8491	3531	53.0844
3530	53.4019	3530	52.9727	3530	53.2306	3530	53.6024	3530	52.8878
3529	53.168	3529	52.7819	3529	52.9831	3529	53.3594	3529	52.7132
3528	52.9312	3528	52.5943	3528	52.784	3528	53.1266	3528	52.5256
3527	52.6915	3527	52.4093	3527	52.601	3527	52.9034	3527	52.3047
3526	52.4525	3526	52.2297	3526	52.4071	3526	52.6795	3526	52.0643
3525	52.2226	3525	52.0454	3525	52.2072	3525	52.4443	3525	51.8332
3524	52.013	3524	51.8399	3524	52.0288	3524	52.2031	3524	51.6265
3523	51.8284	3523	51.6121	3523	51.8867	3523	51.9767	3523	51.4426
3522	51.658	3522	51.3807	3522	51.7631	3522	51.7767	3522	51.2759
3521	51.4791	3521	51.1632	3521	51.623	3521	51.5924	3521	51.1188
3520	51.2735	3520	50.9572	3520	51.4434	3520	51.4058	3520	50.9543
3519	51.0425	3519	50.7435	3519	51.2218	3519	51.2057	3519	50.7577
3518	50.8024	3518	50.5071	3518	50.9644	3518	50.9862	3518	50.5158
3517	50.5655	3517	50.2556	3517	50.6754	3517	50.7434	3517	50.2412
3516	50.33	3516	50.0169	3516	50.3652	3516	50.488	3516	49.9659
3515	50.0907	3515	49.8161	3515	50.0643	3515	50.2475	3515	49.719
3514	49.8552	3514	49.6512	3514	49.8154	3514	50.0443	3514	49.5097
3513	49.6421	3513	49.4924	3513	49.6394	3513	49.8727	3513	49.3275
3512	49.4624	3512	49.3092	3512	49.5101	3512	49.7072	3512	49.156
3511	49.3062	3511	49.1033	3511	49.3727	3511	49.5315	3511	48.9857
3510	49.1536	3510	48.9092	3510	49.1923	3510	49.3487	3510	48.8146
3509	48.9934	3509	48.754	3509	48.9815	3509	49.1646	3509	48.638
3508	48.8235	3508	48.6195	3508	48.7753	3508	48.9686	3508	48.444
3507	48.6337	3507	48.4507	3507	48.5867	3507	48.7352	3507	48.219
3506	48.4037	3506	48.2046	3506	48.3961	3506	48.4464	3506	47.9584
3505	48.1287	3505	47.8923	3505	48.1782	3505	48.1227	3505	47.6757
3504	47.8434	3504	47.5828	3504	47.9328	3504	47.8371	3504	47.4029
3503	47.602	3503	47.3518	3503	47.6898	3503	47.6673	3503	47.1741
3502	47.4239	3502	47.2157	3502	47.4826	3502	47.611	3502	46.996
3501	47.2704	3501	47.1185	3501	47.3168	3501	47.5676	3501	46.8388
3500	47.087	3500	46.9882	3500	47.1657	3500	47.4294	3500	46.6613
3499	46.8601	3499	46.7977	3499	46.9968	3499	47.1728	3499	46.4433
3498	46.6253	3498	46.5714	3498	46.7992	3498	46.8568	3498	46.1929
3497	46.4259	3497	46.3465	3497	46.5883	3497	46.5528	3497	45.9335
3496	46.2709	3496	46.137	3496	46.3857	3496	46.2946	3496	45.6939
3495	46.1338	3495	45.9328	3495	46.1993	3495	46.0846	3495	45.5032
3494	45.9812	3494	45.7209	3494	46.0199	3494	45.9126	3494	45.3758
3493	45.7938	3493	45.5003	3493	45.8331	3493	45.7564	3493	45.2898
3492	45.5699	3492	45.2802	3492	45.6296	3492	45.5862	3492	45.1933
3491	45.3227	3491	45.0729	3491	45.409	3491	45.3873	3491	45.0417
3490	45.0727	3490	44.8844	3490	45.1794	3490	45.171	3490	44.8298
3489	44.8367	3489	44.7094	3489	44.9536	3489	44.9545	3489	44.5858
3488	44.6217	3488	44.5364	3488	44.7454	3488	44.7422	3488	44.3437
3487	44.4304	3487	44.3582	3487	44.5652	3487	44.5331	3487	44.1261
3486	44.2671	3486	44.1752	3486	44.4138	3486	44.3345	3486	43.942
3485	44.1271	3485	43.9855	3485	44.2766	3485	44.1539	3485	43.7815
3484	43.9848	3484	43.7821	3484	44.1298	3484	43.9843	3484	43.615
3483	43.8081	3483	43.5625	3483	43.9586	3483	43.8115	3483	43.4117
3482	43.5922	3482	43.336	3482	43.7698	3482	43.6352	3482	43.1701
3481	43.3725	3481	43.115	3481	43.5778	3481	43.4723	3481	42.9273
3480	43.1921	3480	42.9042	3480	43.3834	3480	43.3377	3480	42.7298
3479	43.0585	3479	42.7041	3479	43.175	3479	43.2248	3479	42.5936
3478	42.9365	3478	42.5203	3478	42.9495	3478	43.1038	3478	42.4942
3477	42.7805	3477	42.3614	3477	42.7185	3477	42.9397	3477	42.3891
3476	42.5718	3476	42.2306	3476	42.4951	3476	42.7168	3476	42.2521
3475	42.3298	3475	42.116	3475	42.2828	3475	42.455	3475	42.085
3474	42.0863	3474	41.9857	3474	42.0794	3474	42.1943	3474	41.8943
3473	41.8529	3473	41.796	3473	41.8815	3473	41.9596	3473	41.6698
3472	41.6217	3472	41.5227	3472	41.6849	3472	41.7438	3472	41.3991
3471	41.3939	3471	41.1934	3471	41.4899	3471	41.5297	3471	41.1039
3470	41.1901	3470	40.8786	3470	41.3075	3470	41.3196	3470	40.8393
3469	41.0261	3469	40.6373	3469	41.151	3469	41.1346	3469	40.6443
3468	40.8885	3468	40.4743	3468	41.0184	3468	40.988	3468	40.5049
3467	40.7515	3467	40.3519	3467	40.8924	3467	40.8666	3467	40.3759
3466	40.6111	3466	40.2323	3466	40.7599	3466	40.7402	3466	40.229
3465	40.4822	3465	40.0973	3465	40.6189	3465	40.5889	3465	40.068
3464	40.3659	3464	39.943	3464	40.4657	3464	40.4192	3464	39.9057
3463	40.2394	3463	39.7762	3463	40.2909	3463	40.2567	3463	39.7452
3462	40.0803	3462	39.6142	3462	40.0962	3462	40.1204	3462	39.5827
3461	39.8888	3461	39.471	3461	39.9021	3461	40.0034	3461	39.4166
3460	39.6798	3460	39.3374	3460	39.7283	3460	39.8765	3460	39.2494
3459	39.4656	3459	39.188	3459	39.5718	3459	39.7109	3459	39.0861
3458	39.2544	3458	39.011	3458	39.4141	3458	39.5025	3458	38.9282
3457	39.0551	3457	38.822	3457	39.2404	3457	39.2778	3457	38.7665
3456	38.8742	3456	38.6474	3456	39.0457	3456	39.0755	3456	38.5848
3455	38.7125	3455	38.5	3455	38.8302	3455	38.9148	3455	38.3783
3454	38.5672	3454	38.3718	3454	38.6042	3454	38.7779	3454	38.1647
3453	38.4327	3453	38.2434	3453	38.3926	3453	38.6318	3453	37.9685
3452	38.2935	3452	38.0977	3452	38.222	3452	38.4642	3452	37.7991
3451	38.1242	3451	37.9279	3451	38.0961	3451	38.2873	3451	37.6493
3450	37.9085	3450	37.7364	3450	37.9902	3450	38.106	3450	37.5079
3449	37.6619	3449	37.5311	3449	37.8698	3449	37.9026	3449	37.3651
3448	37.4366	3448	37.3258	3448	37.7159	3448	37.6678	3448	37.2127
3447	37.2892	3447	37.1402	3447	37.533	3447	37.4306	3447	37.0501
3446	37.2313	3446	36.9879	3446	37.3371	3446	37.2328	3446	36.8901
3445	37.2114	3445	36.8609	3445	37.1407	3445	37.0817	3445	36.7497
3444	37.152	3444	36.7343	3444	36.9509	3444	36.9529	3444	36.6348
3443	37.0099	3443	36.5901	3443	36.7743	3443	36.8266	3443	36.5348
3442	36.7993	3442	36.43	3442	36.612	3442	36.6961	3442	36.4239
3441	36.5593	3441	36.2629	3441	36.4524	3441	36.5475	3441	36.2692
3440	36.3113	3440	36.0885	3440	36.2793	3440	36.3599	3440	36.0519
3439	36.058	3439	35.9009	3439	36.0916	3439	36.1339	3439	35.7906
3438	35.8101	3438	35.7013	3438	35.9087	3438	35.9001	3438	35.5355
3437	35.592	3437	35.4987	3437	35.75	3437	35.6929	3437	35.3265
3436	35.42	3436	35.3031	3436	35.6149	3436	35.5279	3436	35.1613
3435	35.2879	3435	35.1225	3435	35.49	3435	35.4042	3435	35.0127
3434	35.1758	3434	34.9589	3434	35.3672	3434	35.3084	3434	34.8653
3433	35.0665	3433	34.8024	3433	35.2435	3433	35.2119	3433	34.7231
3432	34.954	3432	34.6377	3432	35.1115	3432	35.0847	3432	34.5916
3431	34.8423	3431	34.4644	3431	34.9624	3431	34.9218	3431	34.4696
3430	34.7366	3430	34.3048	3430	34.7999	3430	34.7473	3430	34.3582
3429	34.6287	3429	34.1843	3429	34.6378	3429	34.5905	3429	34.2616
3428	34.5015	3428	34.1097	3428	34.4875	3428	34.4694	3428	34.1763
3427	34.3526	3427	34.0668	3427	34.3541	3427	34.3928	3427	34.0862
3426	34.2046	3426	34.0266	3426	34.2406	3426	34.354	3426	33.9715
3425	34.0795	3425	33.9515	3425	34.1449	3425	34.3167	3425	33.8189
3424	33.9722	3424	33.8143	3424	34.0546	3424	34.2309	3424	33.6309
3423	33.8622	3423	33.6266	3423	33.9556	3423	34.0776	3423	33.4301
3422	33.7428	3422	33.4347	3422	33.8433	3422	33.8857	3422	33.2472
3421	33.6185	3421	33.2749	3421	33.7186	3421	33.6964	3421	33.0942
3420	33.4816	3420	33.141	3420	33.5772	3420	33.527	3420	32.9549
3419	33.3156	3419	33.0076	3419	33.4157	3419	33.3738	3419	32.8087
3418	33.124	3418	32.8665	3418	33.2427	3418	33.2298	3418	32.6567
3417	32.9336	3417	32.7209	3417	33.0709	3417	33.084	3417	32.5136
3416	32.7691	3416	32.5631	3416	32.9036	3416	32.9232	3416	32.3862
3415	32.6373	3415	32.3864	3415	32.7424	3415	32.7498	3415	32.271
3414	32.5341	3414	32.2117	3414	32.6022	3414	32.5868	3414	32.1643
3413	32.4457	3413	32.0763	3413	32.5001	3413	32.4495	3413	32.0608
3412	32.3452	3412	31.9932	3412	32.4275	3412	32.3262	3412	31.9515
3411	32.2119	3411	31.9397	3411	32.3497	3411	32.2004	3411	31.8351
3410	32.0626	3410	31.8847	3410	32.2397	3410	32.0795	3410	31.7226
3409	31.9426	3409	31.8113	3409	32.1009	3409	31.9851	3409	31.6192
3408	31.8737	3408	31.7135	3408	31.9546	3408	31.9229	3408	31.509
3407	31.8254	3407	31.5901	3407	31.8147	3407	31.8736	3407	31.3753
3406	31.7484	3406	31.4464	3406	31.6777	3406	31.8056	3406	31.2288
3405	31.6208	3405	31.292	3405	31.5289	3405	31.6869	3405	31.0986
3404	31.4591	3404	31.1352	3404	31.3593	3404	31.5016	3404	30.9968
3403	31.296	3403	30.9834	3403	31.1828	3403	31.271	3403	30.9086
3402	31.1587	3402	30.8488	3402	31.0342	3402	31.0497	3402	30.8188
3401	31.0599	3401	30.7395	3401	30.9381	3401	30.884	3401	30.7271
3400	30.9948	3400	30.6527	3400	30.8853	3400	30.7774	3400	30.6362
3399	30.9454	3399	30.5821	3399	30.8453	3399	30.704	3399	30.5385
3398	30.8924	3398	30.5265	3398	30.7979	3398	30.6423	3398	30.4262
3397	30.8216	3397	30.4772	3397	30.7371	3397	30.5817	3397	30.3062
3396	30.7237	3396	30.4062	3396	30.6542	3396	30.5097	3396	30.1959
3395	30.5974	3395	30.2869	3395	30.5375	3395	30.4134	3395	30.1036
3394	30.452	3394	30.1298	3394	30.3934	3394	30.2987	3394	30.0204
3393	30.3044	3393	29.9836	3393	30.2541	3393	30.1918	3393	29.931
3392	30.1744	3392	29.8968	3392	30.1605	3392	30.1196	3392	29.834
3391	30.0836	3391	29.8819	3391	30.1385	3391	30.0922	3391	29.7485
3390	30.0466	3390	29.9114	3390	30.1804	3390	30.0982	3390	29.6921
3389	30.0529	3389	29.9342	3389	30.2341	3389	30.1116	3389	29.6581
3388	30.0631	3388	29.9034	3388	30.225	3388	30.1046	3388	29.6215
3387	30.0398	3387	29.8063	3387	30.1151	3387	30.062	3387	29.5674
3386	29.9765	3386	29.6738	3386	29.946	3386	29.9838	3386	29.5032
3385	29.8895	3385	29.5505	3385	29.8026	3385	29.879	3385	29.4413
3384	29.7904	3384	29.4555	3384	29.7294	3384	29.7636	3384	29.3833
3383	29.684	3383	29.3805	3383	29.6984	3383	29.6603	3383	29.3241
3382	29.586	3382	29.3172	3382	29.6557	3382	29.5839	3382	29.2569
3381	29.5168	3381	29.2711	3381	29.5758	3381	29.5232	3381	29.1685
3380	29.4774	3380	29.2457	3380	29.4687	3380	29.4533	3380	29.0486
3379	29.4458	3379	29.2315	3379	29.3579	3379	29.3719	3379	28.9138
3378	29.3987	3378	29.2132	3378	29.2643	3378	29.3061	3378	28.8052
3377	29.3272	3377	29.1812	3377	29.2003	3377	29.2746	3377	28.7443
3376	29.2333	3376	29.1313	3376	29.1647	3376	29.2617	3376	28.7043
3375	29.1296	3375	29.0606	3375	29.1433	3375	29.2361	3375	28.6417
3374	29.0357	3374	28.9675	3374	29.1151	3374	29.1822	3374	28.5462
3373	28.961	3373	28.8558	3373	29.0582	3373	29.1011	3373	28.4446
3372	28.8911	3372	28.7392	3372	28.9629	3372	28.9984	3372	28.3619
3371	28.8055	3371	28.6408	3371	28.8475	3371	28.8865	3371	28.3006
3370	28.708	3370	28.577	3370	28.7515	3370	28.7907	3370	28.2553
3369	28.6258	3369	28.5388	3369	28.6991	3369	28.7362	3369	28.2291
3368	28.5818	3368	28.5001	3368	28.6776	3368	28.729	3368	28.2313
3367	28.5807	3367	28.4526	3367	28.6639	3367	28.753	3367	28.2661
3366	28.613	3366	28.4185	3366	28.6565	3366	28.7796	3366	28.3223
3365	28.6543	3365	28.4185	3365	28.66	3365	28.7796	3365	28.3728
3364	28.6669	3364	28.4402	3364	28.6533	3364	28.7407	3364	28.3899
3363	28.6283	3363	28.4523	3363	28.6095	3363	28.6792	3363	28.3694
3362	28.5588	3362	28.4422	3362	28.5436	3362	28.6235	3362	28.3331
3361	28.5043	3361	28.4205	3361	28.5073	3361	28.583	3361	28.3015
3360	28.4886	3360	28.3945	3360	28.5288	3360	28.5458	3360	28.2694
3359	28.4975	3359	28.3553	3359	28.5782	3359	28.5065	3359	28.2188
3358	28.5071	3358	28.2932	3358	28.6023	3358	28.4774	3358	28.1491
3357	28.5077	3357	28.2136	3357	28.5747	3357	28.4655	3357	28.0833
3356	28.4998	3356	28.1342	3356	28.5082	3356	28.4588	3356	28.0447
3355	28.4845	3355	28.0734	3355	28.4358	3355	28.4459	3355	28.0334
3354	28.4628	3354	28.039	3354	28.3874	3354	28.4275	3354	28.0225
3353	28.4339	3353	28.0239	3353	28.3727	3353	28.403	3353	27.9803
3352	28.3931	3352	28.0158	3352	28.379	3352	28.3647	3352	27.9024
3351	28.3425	3351	28.0146	3351	28.3899	3351	28.3201	3351	27.8249
3350	28.3	3350	28.0355	3350	28.4019	3350	28.2977	3350	27.7937
3349	28.2808	3349	28.0846	3349	28.4122	3349	28.3138	3349	27.8186
3348	28.2748	3348	28.1407	3348	28.4013	3348	28.3477	3348	27.8666
3347	28.2567	3347	28.1706	3347	28.3522	3347	28.3659	3347	27.899
3346	28.2175	3346	28.1589	3346	28.2817	3346	28.3565	3346	27.8987
3345	28.1715	3345	28.1185	3345	28.2288	3345	28.3294	3345	27.8628
3344	28.1385	3344	28.0752	3344	28.2099	3344	28.2985	3344	27.7953
3343	28.131	3343	28.0458	3343	28.2063	3343	28.2755	3343	27.719
3342	28.1529	3342	28.0265	3342	28.198	3342	28.2673	3342	27.672
3341	28.1899	3341	27.9989	3341	28.1883	3341	28.2654	3341	27.675
3340	28.2076	3340	27.9523	3340	28.1861	3340	28.2504	3340	27.7116
3339	28.1804	3339	27.903	3339	28.1864	3339	28.2194	3339	27.7559
3338	28.1272	3338	27.8824	3338	28.1802	3338	28.196	3338	27.8024
3337	28.098	3337	27.9028	3337	28.1711	3337	28.2001	3337	27.8559
3336	28.1212	3336	27.944	3336	28.1717	3336	28.223	3336	27.9067
3335	28.1789	3335	27.9772	3335	28.1906	3335	28.2419	3335	27.9348
3334	28.2335	3334	27.9889	3334	28.226	3334	28.2457	3334	27.9338
3333	28.2633	3333	27.9792	3333	28.2641	3333	28.2363	3333	27.916
3332	28.2714	3332	27.9572	3332	28.2829	3332	28.2214	3332	27.8989
3331	28.2722	3331	27.9465	3331	28.2685	3331	28.2156	3331	27.8938
3330	28.2762	3330	27.9758	3330	28.2298	3330	28.2306	3330	27.8997
3329	28.2799	3329	28.0486	3329	28.1909	3329	28.254	3329	27.8987
3328	28.2719	3328	28.1307	3328	28.1694	3328	28.2565	3328	27.8703
3327	28.2515	3327	28.1832	3327	28.1688	3327	28.2335	3327	27.8214
3326	28.2339	3326	28.1986	3326	28.1831	3326	28.2189	3326	27.7892
3325	28.228	3325	28.194	3325	28.1994	3325	28.2409	3325	27.8031
3324	28.2238	3324	28.1822	3324	28.2033	3324	28.2832	3324	27.8516
3323	28.215	3323	28.1634	3323	28.1964	3323	28.3089	3323	27.9
3322	28.2181	3322	28.1378	3322	28.2034	3322	28.3051	3322	27.928
3321	28.2497	3321	28.1109	3321	28.2446	3321	28.2845	3321	27.9408
3320	28.2949	3320	28.0909	3320	28.3086	3320	28.2627	3320	27.9522
3319	28.3207	3319	28.0873	3319	28.3639	3319	28.2537	3319	27.9674
3318	28.3135	3318	28.1023	3318	28.3934	3318	28.2731	3318	27.9782
3317	28.2879	3317	28.1198	3317	28.4017	3317	28.3222	3317	27.9679
3316	28.2635	3316	28.1145	3316	28.3973	3316	28.3791	3316	27.9308
3315	28.252	3315	28.0834	3315	28.3871	3315	28.4223	3315	27.8875
3314	28.258	3314	28.0541	3314	28.3833	3314	28.4524	3314	27.8694
3313	28.2748	3313	28.0535	3313	28.394	3313	28.4759	3313	27.8831
3312	28.2837	3312	28.0782	3312	28.4072	3312	28.483	3312	27.9055
3311	28.2753	3311	28.1068	3311	28.4023	3311	28.4625	3311	27.915
3310	28.2659	3310	28.1268	3310	28.3779	3310	28.4277	3310	27.9115
3309	28.2756	3309	28.1381	3309	28.3527	3309	28.4042	3309	27.8996
3308	28.3018	3308	28.1412	3308	28.3425	3308	28.4013	3308	27.8791
3307	28.3327	3307	28.1382	3307	28.3494	3307	28.4124	3307	27.8598
3306	28.3727	3306	28.1373	3306	28.3692	3306	28.4334	3306	27.8615
3305	28.4313	3305	28.1456	3305	28.3934	3305	28.4608	3305	27.8849
3304	28.494	3304	28.163	3304	28.4089	3304	28.4821	3304	27.9044
3303	28.5324	3303	28.1865	3303	28.413	3303	28.4876	3303	27.9043
3302	28.538	3302	28.2087	3302	28.4212	3302	28.4866	3302	27.9011
3301	28.5235	3301	28.2125	3301	28.4433	3301	28.4931	3301	27.9133
3300	28.4987	3300	28.1863	3300	28.4611	3300	28.5031	3300	27.9308
3299	28.4685	3299	28.1506	3299	28.4511	3299	28.5018	3299	27.9337
3298	28.4476	3298	28.1469	3298	28.4228	3298	28.4907	3298	27.9244
3297	28.4502	3297	28.1864	3297	28.4107	3297	28.4901	3297	27.9211
3296	28.4687	3296	28.2312	3296	28.4307	3296	28.517	3296	27.9314
3295	28.4858	3295	28.2416	3295	28.4669	3295	28.5717	3295	27.9526
3294	28.5047	3294	28.2231	3294	28.5011	3294	28.6406	3294	27.9849
3293	28.5402	3293	28.2104	3293	28.5319	3293	28.704	3293	28.0266
3292	28.5837	3292	28.2227	3292	28.5654	3292	28.7446	3292	28.0661
3291	28.6046	3291	28.2548	3291	28.6046	3291	28.7602	3291	28.0928
3290	28.5889	3290	28.2968	3290	28.6504	3290	28.7622	3290	28.1069
3289	28.5546	3289	28.3405	3289	28.6966	3289	28.7578	3289	28.1091
3288	28.5281	3288	28.3773	3288	28.7273	3288	28.7443	3288	28.0983
3287	28.5249	3287	28.4057	3287	28.7353	3287	28.7257	3287	28.089
3286	28.5509	3286	28.4324	3286	28.7371	3286	28.7212	3286	28.1114
3285	28.6	3285	28.4534	3285	28.7513	3285	28.7462	3285	28.1771
3284	28.649	3284	28.4522	3284	28.7683	3284	28.7916	3284	28.2602
3283	28.6759	3283	28.4282	3283	28.7638	3283	28.8313	3283	28.3269
3282	28.6846	3282	28.4106	3282	28.7371	3282	28.8417	3282	28.3668
3281	28.6966	3281	28.4244	3281	28.7125	3281	28.8104	3281	28.3817
3280	28.7188	3280	28.4585	3280	28.7053	3280	28.7416	3280	28.3671
3279	28.7404	3279	28.4862	3279	28.7085	3279	28.6632	3279	28.3249
3278	28.7541	3278	28.5012	3278	28.7105	3278	28.6151	3278	28.278
3277	28.765	3277	28.5149	3277	28.7069	3277	28.6198	3277	28.2498
3276	28.7778	3276	28.5321	3276	28.6962	3276	28.6691	3276	28.2425
3275	28.794	3275	28.5506	3275	28.6861	3275	28.7406	3275	28.2508
3274	28.8154	3274	28.576	3274	28.7001	3274	28.814	3274	28.2791
3273	28.8353	3273	28.6129	3273	28.7556	3273	28.8689	3273	28.3255
3272	28.8354	3272	28.6506	3272	28.8346	3272	28.8917	3272	28.3678
3271	28.8114	3271	28.6759	3271	28.8972	3271	28.8939	3271	28.3895
3270	28.7921	3270	28.6923	3270	28.9238	3270	28.904	3270	28.4033
3269	28.8109	3269	28.7125	3269	28.9276	3269	28.9317	3269	28.4289
3268	28.8642	3268	28.7423	3268	28.93	3268	28.9568	3268	28.4608
3267	28.9197	3267	28.7814	3267	28.945	3267	28.9658	3267	28.4823
3266	28.9563	3266	28.8264	3266	28.978	3266	28.9745	3266	28.4945
3265	28.9745	3265	28.8584	3265	29.0184	3265	29.003	3265	28.5091
3264	28.9773	3264	28.848	3264	29.0374	3264	29.0461	3264	28.5223
3263	28.9691	3263	28.792	3263	29.0187	3263	29.0871	3263	28.5225
3262	28.9687	3262	28.7307	3262	28.9871	3262	29.1215	3262	28.5131
3261	28.9954	3261	28.7092	3261	28.9841	3261	29.1506	3261	28.5079
3260	29.0429	3260	28.7329	3260	29.0164	3260	29.166	3260	28.51
3259	29.0888	3259	28.7769	3259	29.0553	3259	29.1612	3259	28.5163
3258	29.1266	3258	28.8241	3258	29.081	3258	29.1471	3258	28.5332
3257	29.1667	3257	28.8702	3257	29.1009	3257	29.1429	3257	28.5668
3256	29.2112	3256	28.905	3256	29.1247	3256	29.1594	3256	28.606
3255	29.2516	3255	28.9184	3255	29.153	3255	29.2015	3255	28.6357
3254	29.2888	3254	28.9187	3254	29.1947	3254	29.2714	3254	28.6596
3253	29.3308	3253	28.9261	3253	29.2637	3253	29.356	3253	28.6924
3252	29.3717	3252	28.9501	3252	29.3495	3252	29.4276	3252	28.7349
3251	29.3965	3251	28.9879	3251	29.4146	3251	29.47	3251	28.7761
3250	29.4058	3250	29.0364	3250	29.4353	3250	29.4936	3250	28.8139
3249	29.4157	3249	29.0881	3249	29.4282	3249	29.5138	3249	28.8579
3248	29.4347	3248	29.1254	3248	29.4283	3248	29.5301	3248	28.9129
3247	29.4587	3247	29.1368	3247	29.4568	3247	29.538	3247	28.9729
3246	29.4864	3246	29.1354	3246	29.5141	3246	29.5456	3246	29.0269
3245	29.5217	3245	29.1456	3245	29.5913	3245	29.5656	3245	29.0639
3244	29.5655	3244	29.1815	3244	29.6771	3244	29.6003	3244	29.0823
3243	29.6202	3243	29.247	3243	29.7615	3243	29.6441	3243	29.1002
3242	29.6952	3242	29.342	3242	29.8385	3242	29.6901	3242	29.1442
3241	29.7886	3241	29.4508	3241	29.9015	3241	29.7293	3241	29.2181
3240	29.8757	3240	29.5362	3240	29.9435	3240	29.761	3240	29.2949
3239	29.9341	3239	29.5706	3239	29.9679	3239	29.8066	3239	29.3492
3238	29.9719	3238	29.5656	3238	29.9928	3238	29.8899	3238	29.3834
3237	30.0117	3237	29.558	3237	30.0307	3237	29.9987	3237	29.4129
3236	30.0579	3236	29.5739	3236	30.0755	3236	30.0904	3236	29.4456
3235	30.1013	3235	29.6193	3235	30.1195	3235	30.146	3235	29.4875
3234	30.1446	3234	29.691	3234	30.1731	3234	30.19	3234	29.5489
3233	30.1968	3233	29.7788	3233	30.2471	3233	30.2457	3233	29.6302
3232	30.2521	3232	29.8647	3232	30.3265	3232	30.3043	3232	29.7155
3231	30.3025	3231	29.9399	3231	30.3873	3231	30.3551	3231	29.7968
3230	30.3592	3230	30.0167	3230	30.4326	3230	30.4161	3230	29.8889
3229	30.4382	3229	30.1117	3229	30.4884	3229	30.5039	3229	30.0026
3228	30.5295	3228	30.2246	3228	30.5666	3228	30.5984	3228	30.1209
3227	30.6091	3227	30.3442	3227	30.6535	3227	30.6664	3227	30.2178
3226	30.6733	3226	30.4644	3226	30.7348	3226	30.7093	3226	30.2903
3225	30.7373	3225	30.5822	3225	30.8081	3225	30.7586	3225	30.3536
3224	30.8072	3224	30.691	3224	30.8737	3224	30.8373	3224	30.4174
3223	30.8782	3223	30.7892	3223	30.9326	3223	30.9446	3223	30.4829
3222	30.9537	3222	30.8843	3222	30.994	3222	31.0696	3222	30.5501
3221	31.0402	3221	30.9764	3221	31.0688	3221	31.1976	3221	30.6179
3220	31.1292	3220	31.0514	3220	31.1534	3220	31.3108	3220	30.6855
3219	31.2099	3219	31.1048	3219	31.2351	3219	31.4031	3219	30.7641
3218	31.2921	3218	31.1572	3218	31.313	3218	31.4868	3218	30.8702
3217	31.3955	3217	31.2314	3217	31.3996	3217	31.5751	3217	30.9993
3216	31.5228	3216	31.3287	3216	31.5044	3216	31.6672	3216	31.1236
3215	31.6641	3215	31.4389	3215	31.6278	3215	31.7604	3215	31.2255
3214	31.8151	3214	31.559	3214	31.7668	3214	31.8613	3214	31.316
3213	31.9669	3213	31.6842	3213	31.9118	3213	31.9725	3213	31.4092
3212	32.0923	3212	31.7993	3212	32.0472	3212	32.0834	3212	31.5023
3211	32.175	3211	31.8991	3211	32.169	3211	32.1875	3211	31.596
3210	32.2452	3210	32.0057	3210	32.2959	3210	32.2971	3210	31.7105
3209	32.3536	3209	32.1444	3209	32.4454	3209	32.4254	3209	31.8589
3208	32.5112	3208	32.3099	3208	32.6067	3208	32.5646	3208	32.021
3207	32.6828	3207	32.472	3207	32.7532	3207	32.6967	3207	32.163
3206	32.8339	3206	32.6089	3206	32.8735	3206	32.814	3206	32.2697
3205	32.9588	3205	32.7203	3205	32.9758	3205	32.919	3205	32.3476
3204	33.0677	3204	32.8187	3204	33.0717	3204	33.017	3204	32.4126
3203	33.1735	3203	32.9227	3203	33.1732	3203	33.1198	3203	32.4906
3202	33.2915	3202	33.0508	3202	33.298	3202	33.2454	3202	32.6105
3201	33.4307	3201	33.207	3201	33.4546	3201	33.4013	3201	32.7773
3200	33.5822	3200	33.3747	3200	33.6242	3200	33.5759	3200	32.9647
3199	33.7314	3199	33.5346	3199	33.776	3199	33.7535	3199	33.1466
3198	33.8764	3198	33.6793	3198	33.8984	3198	33.9265	3198	33.3203
3197	34.0204	3197	33.8075	3197	34.006	3197	34.0891	3197	33.4881
3196	34.1594	3196	33.9183	3196	34.1227	3196	34.2333	3196	33.6381
3195	34.296	3195	34.0213	3195	34.2695	3195	34.3611	3195	33.7648
3194	34.4493	3194	34.1394	3194	34.4557	3194	34.4858	3194	33.8862
3193	34.6277	3193	34.2877	3193	34.6658	3193	34.6144	3193	34.0226
3192	34.8037	3192	34.458	3192	34.864	3192	34.7438	3192	34.1715
3191	34.9461	3191	34.6317	3191	35.0309	3191	34.8803	3191	34.3229
3190	35.0649	3190	34.7974	3190	35.1851	3190	35.0426	3190	34.4834
3189	35.1987	3189	34.9493	3189	35.3552	3189	35.2369	3189	34.6668
3188	35.3659	3188	35.0851	3188	35.5414	3188	35.4432	3188	34.8703
3187	35.5534	3187	35.2145	3187	35.7228	3187	35.6382	3187	35.0774
3186	35.7459	3186	35.3557	3186	35.8913	3186	35.8176	3186	35.2732
3185	35.9359	3185	35.5141	3185	36.0565	3185	35.9893	3185	35.4472
3184	36.114	3184	35.6778	3184	36.2251	3184	36.1593	3184	35.5942
3183	36.2776	3183	35.8422	3183	36.397	3183	36.3342	3183	35.7276
3182	36.4448	3182	36.0193	3182	36.5746	3182	36.5232	3182	35.8739
3181	36.6338	3181	36.2152	3181	36.7582	3181	36.7252	3181	36.0439
3180	36.8332	3180	36.4187	3180	36.937	3180	36.9252	3180	36.2236
3179	37.019	3179	36.6252	3179	37.1035	3179	37.1116	3179	36.4038
3178	37.1941	3178	36.8504	3178	37.2711	3178	37.2878	3178	36.5979
3177	37.3854	3177	37.1015	3177	37.46	3177	37.4623	3177	36.8147
3176	37.6039	3176	37.3544	3176	37.6712	3176	37.6388	3176	37.0365
3175	37.834	3175	37.5798	3175	37.8889	3175	37.8213	3175	37.2448
3174	38.0578	3174	37.7805	3174	38.1027	3174	38.0165	3174	37.4482
3173	38.2674	3173	37.98	3173	38.3122	3173	38.2258	3173	37.6644
3172	38.456	3172	38.1869	3172	38.5191	3172	38.4445	3172	37.8864
3171	38.6231	3171	38.3879	3171	38.7283	3171	38.6687	3171	38.0907
3170	38.7847	3170	38.5728	3170	38.9462	3170	38.894	3170	38.2675
3169	38.959	3169	38.7496	3169	39.1662	3169	39.1097	3169	38.4287
3168	39.1464	3168	38.9357	3168	39.3673	3168	39.3103	3168	38.5928
3167	39.3415	3167	39.1413	3167	39.5432	3167	39.5096	3167	38.7775
3166	39.5545	3166	39.3617	3166	39.7197	3166	39.7251	3166	38.9967
3165	39.7952	3165	39.5807	3165	39.924	3165	39.951	3165	39.2478
3164	40.0453	3164	39.7862	3164	40.1492	3164	40.1665	3164	39.5063
3163	40.2746	3163	39.9845	3163	40.3678	3163	40.3696	3163	39.7448
3162	40.479	3162	40.1895	3162	40.5705	3162	40.58	3162	39.9524
3161	40.6796	3161	40.3997	3161	40.7694	3161	40.8063	3161	40.1321
3160	40.8873	3160	40.602	3160	40.9748	3160	41.0343	3160	40.2952
3159	41.0976	3159	40.7996	3159	41.1918	3159	41.2505	3159	40.4653
3158	41.3132	3158	41.016	3158	41.4312	3158	41.4579	3158	40.6709
3157	41.5441	3157	41.2636	3157	41.6985	3157	41.6613	3157	40.9174
3156	41.7837	3156	41.5253	3156	41.9747	3156	41.8597	3156	41.1763
3155	42.011	3155	41.7762	3155	42.2285	3155	42.059	3155	41.4184
3154	42.2221	3154	42.008	3154	42.4517	3154	42.2759	3154	41.6469
3153	42.4364	3153	42.2254	3153	42.6645	3153	42.5216	3153	41.8856
3152	42.6695	3152	42.4345	3152	42.8897	3152	42.7946	3152	42.1451
3151	42.9211	3151	42.6487	3151	43.133	3151	43.0881	3151	42.4126
3150	43.1872	3150	42.8907	3150	43.3851	3150	43.3869	3150	42.6696
3149	43.4641	3149	43.1722	3149	43.63	3149	43.6581	3149	42.9082
3148	43.7372	3148	43.4755	3148	43.8558	3148	43.8727	3148	43.1363
3147	43.988	3147	43.765	3147	44.0721	3147	44.0448	3147	43.3725
3146	44.218	3146	44.012	3146	44.308	3146	44.228	3146	43.6286
3145	44.447	3145	44.2101	3145	44.5801	3145	44.4642	3145	43.8925
3144	44.6854	3144	44.3786	3144	44.8662	3144	44.7472	3144	44.1385
3143	44.9262	3143	44.5559	3143	45.1279	3143	45.0408	3143	44.3563
3142	45.1647	3142	44.7741	3142	45.3548	3142	45.3182	3142	44.559
3141	45.4101	3141	45.0314	3141	45.5718	3141	45.5799	3141	44.7625
3140	45.6728	3140	45.2985	3140	45.8092	3140	45.8474	3140	44.9735
3139	45.9519	3139	45.5552	3139	46.0797	3139	46.1434	3139	45.1994
3138	46.2361	3138	45.8087	3138	46.3774	3138	46.4655	3138	45.4502
3137	46.5049	3137	46.0768	3137	46.6812	3137	46.7799	3137	45.7207
3136	46.7358	3136	46.3678	3136	46.9622	3136	47.0518	3136	45.9899
3135	46.9284	3135	46.6783	3135	47.2041	3135	47.2818	3135	46.2455
3134	47.1175	3134	46.9929	3134	47.4225	3134	47.4983	3134	46.494
3133	47.3463	3133	47.2835	3133	47.6515	3133	47.7216	3133	46.7426
3132	47.625	3132	47.5285	3132	47.9126	3132	47.9535	3132	46.9902
3131	47.9306	3131	47.7413	3131	48.2015	3131	48.1982	3131	47.243
3130	48.2402	3130	47.9621	3130	48.4999	3130	48.4661	3130	47.5146
3129	48.5438	3129	48.216	3129	48.7875	3129	48.7563	3129	47.7993
3128	48.828	3128	48.4921	3128	49.0479	3128	49.051	3128	48.0684
3127	49.0746	3127	48.768	3127	49.2757	3127	49.3312	3127	48.3105
3126	49.2825	3126	49.0343	3126	49.4808	3126	49.5844	3126	48.5531
3125	49.477	3125	49.2905	3125	49.6808	3125	49.8028	3125	48.8249
3124	49.6873	3124	49.5356	3124	49.8916	3124	49.996	3124	49.1127
3123	49.9256	3123	49.7743	3123	50.1249	3123	50.2005	3123	49.3797
3122	50.1872	3122	50.0178	3122	50.3849	3122	50.4521	3122	49.6133
3121	50.4579	3121	50.2667	3121	50.6604	3121	50.7458	3121	49.8335
3120	50.7185	3120	50.5083	3120	50.9322	3120	51.0446	3120	50.0585
3119	50.9589	3119	50.7411	3119	51.1986	3119	51.3254	3119	50.2895
3118	51.193	3118	50.9868	3118	51.4813	3118	51.5956	3118	50.5257
3117	51.4479	3117	51.2671	3117	51.7945	3117	51.8641	3117	50.7772
3116	51.7345	3116	51.5777	3116	52.1192	3116	52.1242	3116	51.0535
3115	52.0384	3115	51.8967	3115	52.4243	3115	52.3717	3115	51.3509
3114	52.3394	3114	52.2047	3114	52.7028	3114	52.6201	3114	51.6546
3113	52.6261	3113	52.488	3113	52.9697	3113	52.8848	3113	51.9499
3112	52.8917	3112	52.7358	3112	53.2297	3112	53.1673	3112	52.2316
3111	53.129	3111	52.9485	3111	53.4686	3111	53.4569	3111	52.5072
3110	53.3405	3110	53.1459	3110	53.6798	3110	53.7386	3110	52.7863
3109	53.5451	3109	53.3565	3109	53.8837	3109	53.9988	3109	53.0683
3108	53.7696	3108	53.6006	3108	54.1146	3108	54.2402	3108	53.3434
3107	54.034	3107	53.883	3107	54.3924	3107	54.4889	3107	53.6072
3106	54.3426	3106	54.1936	3106	54.7091	3106	54.7727	3106	53.866
3105	54.6787	3105	54.5079	3105	55.0344	3105	55.0893	3105	54.1245
3104	55.008	3104	54.7993	3104	55.3356	3104	55.4089	3104	54.3795
3103	55.3002	3103	55.0581	3103	55.5993	3103	55.705	3103	54.6304
3102	55.5535	3102	55.2974	3102	55.8381	3102	55.9704	3102	54.8855
3101	55.7928	3101	55.5401	3101	56.0755	3101	56.2089	3101	55.1523
3100	56.0433	3100	55.804	3100	56.3285	3100	56.4292	3100	55.425
3099	56.3119	3099	56.0952	3099	56.6019	3099	56.6496	3099	55.6904
3098	56.5905	3098	56.4004	3098	56.8928	3098	56.8906	3098	55.9414
3097	56.8671	3097	56.6885	3097	57.1911	3097	57.1603	3097	56.1844
3096	57.1323	3096	56.9351	3096	57.4826	3096	57.454	3096	56.4366
3095	57.387	3095	57.1529	3095	57.7604	3095	57.7651	3095	56.7119
3094	57.6455	3094	57.3819	3094	58.0277	3094	58.0838	3094	57.004
3093	57.9214	3093	57.6462	3093	58.2869	3093	58.3905	3093	57.284
3092	58.2079	3092	57.9333	3092	58.5342	3092	58.6657	3092	57.5283
3091	58.4841	3091	58.218	3091	58.769	3091	58.9089	3091	57.7489
3090	58.7414	3090	58.4889	3090	59	3090	59.1371	3090	57.9835
3089	58.9915	3089	58.7469	3089	59.2331	3089	59.3689	3089	58.252
3088	59.2435	3088	58.9934	3088	59.4638	3088	59.6175	3088	58.5359
3087	59.4879	3087	59.2334	3087	59.6931	3087	59.8915	3087	58.8063
3086	59.716	3086	59.48	3086	59.9421	3086	60.1865	3086	59.0618
3085	59.9427	3085	59.7444	3085	60.2325	3085	60.4811	3085	59.3279
3084	60.1934	3084	60.0249	3084	60.554	3084	60.7538	3084	59.6236
3083	60.4707	3083	60.3087	3083	60.8665	3083	61.0029	3083	59.9371
3082	60.7513	3082	60.5823	3082	61.1399	3082	61.2387	3082	60.2351
3081	61.0176	3081	60.8386	3081	61.3794	3081	61.4669	3081	60.4945
3080	61.2799	3080	61.0848	3080	61.6122	3080	61.6915	3080	60.7235
3079	61.5578	3079	61.3436	3079	61.8598	3079	61.926	3079	60.9504
3078	61.8509	3078	61.6343	3078	62.1295	3078	62.1857	3078	61.193
3077	62.1354	3077	61.9478	3077	62.4193	3077	62.4682	3077	61.4458
3076	62.3879	3076	62.2518	3076	62.7184	3076	62.7537	3076	61.6981
3075	62.6038	3075	62.5243	3075	63.0049	3075	63.0206	3075	61.9536
3074	62.7995	3074	62.7734	3074	63.2566	3074	63.2562	3074	62.2225
3073	63.0027	3073	63.0179	3073	63.4709	3073	63.4628	3073	62.4993
3072	63.241	3072	63.2621	3072	63.6726	3072	63.667	3072	62.7641
3071	63.5239	3071	63.4953	3071	63.8969	3071	63.9079	3071	63.0034
3070	63.8317	3070	63.712	3070	64.1616	3070	64.2001	3070	63.222
3069	64.1263	3069	63.922	3069	64.4541	3069	64.5157	3069	63.4348
3068	64.3836	3068	64.1451	3068	64.7424	3068	64.8144	3068	63.6557
3067	64.6164	3067	64.3977	3067	65.0028	3067	65.0847	3067	63.8912
3066	64.8591	3066	64.6798	3066	65.2361	3066	65.3416	3066	64.1375
3065	65.1297	3065	64.971	3065	65.4615	3065	65.595	3065	64.3832
3064	65.4101	3064	65.2435	3064	65.6959	3064	65.843	3064	64.6236
3063	65.6684	3063	65.4836	3063	65.9422	3063	66.0883	3063	64.8661
3062	65.8925	3062	65.6986	3062	66.1938	3062	66.3411	3062	65.116
3061	66.0976	3061	65.9057	3061	66.4439	3061	66.6033	3061	65.3645
3060	66.302	3060	66.1188	3060	66.6879	3060	66.8634	3060	65.6024
3059	66.5085	3059	66.3434	3059	66.9229	3059	67.1087	3059	65.8371
3058	66.7128	3058	66.5761	3058	67.1496	3058	67.3339	3058	66.0823
3057	66.9223	3057	66.8098	3057	67.3762	3057	67.5444	3057	66.3357
3056	67.1536	3056	67.043	3056	67.6131	3056	67.756	3056	66.5815
3055	67.4105	3055	67.2834	3055	67.8619	3055	67.9847	3055	66.8132
3054	67.6764	3054	67.5343	3054	68.1134	3054	68.2283	3054	67.0397
3053	67.9319	3053	67.7819	3053	68.359	3053	68.4678	3053	67.2705
3052	68.1745	3052	68.0079	3052	68.6018	3052	68.6925	3052	67.5101
3051	68.4151	3051	68.2143	3051	68.8525	3051	68.9139	3051	67.7653
3050	68.6613	3050	68.4268	3050	69.1157	3050	69.1485	3050	68.0387
3049	68.9133	3049	68.6676	3049	69.385	3049	69.3978	3049	68.3136
3048	69.1708	3048	68.9311	3048	69.6483	3048	69.6547	3048	68.5617
3047	69.4343	3047	69.1899	3047	69.8929	3047	69.9149	3047	68.7694
3046	69.6968	3046	69.4191	3046	70.1088	3046	70.1717	3046	68.9482
3045	69.9446	3045	69.6159	3045	70.2962	3045	70.4121	3045	69.1174
3044	70.1688	3044	69.8003	3044	70.4704	3044	70.6313	3044	69.2912
3043	70.3718	3043	70.0014	3043	70.6523	3043	70.8413	3043	69.4842
3042	70.5621	3042	70.2379	3042	70.8534	3042	71.0537	3042	69.7087
3041	70.7465	3041	70.5076	3041	71.071	3041	71.2643	3041	69.9576
3040	70.9285	3040	70.7935	3040	71.2991	3040	71.4666	3040	70.2019
3039	71.111	3039	71.077	3039	71.5361	3039	71.6666	3039	70.416
3038	71.2976	3038	71.3415	3038	71.7812	3038	71.8757	3038	70.6004
3037	71.4962	3037	71.5712	3037	72.0307	3037	72.0988	3037	70.7752
3036	71.7164	3036	71.7601	3036	72.2794	3036	72.3374	3036	70.9608
3035	71.9608	3035	71.9214	3035	72.5208	3035	72.5921	3035	71.1704
3034	72.2187	3034	72.0828	3034	72.7463	3034	72.8502	3034	71.4102
3033	72.4738	3033	72.268	3033	72.9522	3033	73.0862	3033	71.6754
3032	72.717	3032	72.4837	3032	73.1478	3032	73.2893	3032	71.9474
3031	72.9486	3031	72.7205	3031	73.3503	3031	73.4797	3031	72.2044
3030	73.1694	3030	72.9605	3030	73.5657	3030	73.6831	3030	72.4348
3029	73.3788	3029	73.1871	3029	73.783	3029	73.9008	3029	72.6401
3028	73.5799	3028	73.3949	3028	73.9874	3028	74.118	3028	72.8285
3027	73.7789	3027	73.5928	3027	74.174	3027	74.328	3027	73.0101
3026	73.9792	3026	73.7931	3026	74.3474	3026	74.5348	3026	73.1948
3025	74.1803	3025	73.9984	3025	74.5154	3025	74.7401	3025	73.3874
3024	74.3824	3024	74.2022	3024	74.6861	3024	74.9412	3024	73.5844
3023	74.5836	3023	74.4008	3023	74.8642	3023	75.1372	3023	73.7802
3022	74.7778	3022	74.5993	3022	75.048	3022	75.3276	3022	73.9756
3021	74.9631	3021	74.8055	3021	75.2352	3021	75.5136	3021	74.1796
3020	75.1524	3020	75.021	3020	75.4319	3020	75.7037	3020	74.3989
3019	75.3616	3019	75.2393	3019	75.647	3019	75.9066	3019	74.6258
3018	75.588	3018	75.45	3018	75.8759	3018	76.1154	3018	74.8398
3017	75.8073	3017	75.6466	3017	76.0987	3017	76.3109	3017	75.0271
3016	75.9984	3016	75.8328	3016	76.3009	3016	76.4888	3016	75.1967
3015	76.1643	3015	76.0192	3015	76.4897	3015	76.6675	3015	75.3735
3014	76.3253	3014	76.2123	3014	76.6833	3014	76.8628	3014	75.57
3013	76.4989	3013	76.4085	3013	76.8907	3013	77.0716	3013	75.7747
3012	76.6876	3012	76.6006	3012	77.1048	3012	77.2846	3012	75.9703
3011	76.8807	3011	76.7884	3011	77.3098	3011	77.4983	3011	76.1564
3010	77.07	3010	76.9775	3010	77.4946	3010	77.7047	3010	76.3443
3009	77.2646	3009	77.1702	3009	77.663	3009	77.8898	3009	76.5364
3008	77.4856	3008	77.3596	3008	77.8354	3008	78.0529	3008	76.7246
3007	77.7364	3007	77.5342	3007	78.0315	3007	78.2132	3007	76.9061
3006	77.9862	3006	77.69	3006	78.2494	3006	78.3869	3006	77.0911
3005	78.1947	3005	77.8408	3005	78.4673	3005	78.5702	3005	77.2878
3004	78.3537	3004	78.0118	3004	78.6675	3004	78.7523	3004	77.4884
3003	78.4905	3003	78.2159	3003	78.8509	3003	78.9298	3003	77.6757
3002	78.6341	3002	78.4375	3002	79.0271	3002	79.1023	3002	77.8397
3001	78.7943	3001	78.6452	3001	79.2003	3001	79.2705	3001	77.9841
3000	78.9728	3000	78.8215	3000	79.3716	3000	79.4457	3000	78.1201
2999	79.1713	2999	78.9762	2999	79.5446	2999	79.6416	2999	78.2596
2998	79.3799	2998	79.1332	2998	79.7202	2998	79.8482	2998	78.4134
2997	79.5728	2997	79.3105	2997	79.8932	2997	80.032	2997	78.5885
2996	79.7305	2996	79.5115	2996	80.0601	2996	80.1741	2996	78.7811
2995	79.8596	2995	79.723	2995	80.2272	2995	80.292	2995	78.9744
2994	79.9836	2994	79.9218	2994	80.4045	2994	80.4161	2994	79.1508
2993	80.1205	2993	80.0906	2993	80.5934	2993	80.5614	2993	79.3088
2992	80.2769	2992	80.2329	2992	80.7862	2992	80.7286	2992	79.4639
2991	80.4511	2991	80.3661	2991	80.9738	2991	80.9123	2991	79.6295
2990	80.6356	2990	80.501	2990	81.1502	2990	81.0965	2990	79.8005
2989	80.8192	2989	80.6373	2989	81.3129	2989	81.2595	2989	79.9578
2988	80.9974	2988	80.7767	2988	81.4636	2988	81.3973	2988	80.0878
2987	81.176	2987	80.9268	2987	81.6074	2987	81.5273	2987	80.1933
2986	81.361	2986	81.0887	2986	81.7517	2986	81.6634	2986	80.2898
2985	81.549	2985	81.2521	2985	81.905	2985	81.803	2985	80.3969
2984	81.7332	2984	81.4097	2984	82.0743	2984	81.9438	2984	80.5303
2983	81.9122	2983	81.5647	2983	82.2571	2983	82.0936	2983	80.693
2982	82.0861	2982	81.7207	2982	82.4383	2982	82.2522	2982	80.8729
2981	82.2509	2981	81.8726	2981	82.6015	2981	82.4066	2981	81.0531
2980	82.4015	2980	82.0174	2980	82.7433	2980	82.5544	2980	81.225
2979	82.5393	2979	82.1619	2979	82.8731	2979	82.7138	2979	81.3888
2978	82.6723	2978	82.314	2978	83	2978	82.8961	2978	81.5423
2977	82.8086	2977	82.4723	2977	83.1288	2977	83.0863	2977	81.6807
2976	82.9523	2976	82.6301	2976	83.2659	2976	83.2625	2976	81.8081
2975	83.1017	2975	82.7843	2975	83.417	2975	83.4175	2975	81.9413
2974	83.2502	2974	82.9337	2974	83.5752	2974	83.5515	2974	82.0971
2973	83.3925	2973	83.0772	2973	83.7231	2973	83.6656	2973	82.2762
2972	83.5298	2972	83.2191	2972	83.8537	2972	83.7759	2972	82.4631
2971	83.6662	2971	83.3704	2971	83.9819	2971	83.9122	2971	82.6376
2970	83.8011	2970	83.5352	2970	84.1304	2970	84.0848	2970	82.7887
2969	83.9317	2969	83.7026	2969	84.3048	2969	84.268	2969	82.9214
2968	84.0601	2968	83.8571	2968	84.4864	2968	84.4301	2968	83.0497
2967	84.1908	2967	83.9924	2967	84.6458	2967	84.5683	2967	83.1834
2966	84.3219	2966	84.1097	2966	84.7639	2966	84.6999	2966	83.3203
2965	84.4483	2965	84.2119	2965	84.8448	2965	84.8361	2965	83.4533
2964	84.5726	2964	84.3071	2964	84.9136	2964	84.9792	2964	83.5784
2963	84.7058	2963	84.4119	2963	84.9996	2963	85.1309	2963	83.6935
2962	84.8522	2962	84.5377	2962	85.1192	2962	85.2871	2962	83.798
2961	85.0007	2961	84.6767	2961	85.2715	2961	85.4352	2961	83.902
2960	85.1358	2960	84.8103	2960	85.4431	2960	85.5674	2960	84.0282
2959	85.2515	2959	84.9325	2959	85.6151	2959	85.6886	2959	84.1916
2958	85.3558	2958	85.0588	2958	85.7704	2958	85.8045	2958	84.378
2957	85.4652	2957	85.206	2957	85.9032	2957	85.9133	2957	84.5541
2956	85.5938	2956	85.3683	2956	86.0204	2956	86.0171	2956	84.6988
2955	85.7403	2955	85.517	2955	86.129	2955	86.1245	2955	84.8141
2954	85.8863	2954	85.6287	2954	86.228	2954	86.2376	2954	84.9102
2953	86.0111	2953	85.7122	2953	86.3168	2953	86.3492	2953	84.9946
2952	86.1122	2952	85.8035	2952	86.4055	2952	86.4623	2952	85.0807
2951	86.2069	2951	85.9299	2951	86.5076	2951	86.5929	2951	85.1872
2950	86.3165	2950	86.0836	2950	86.6257	2950	86.7454	2950	85.3217
2949	86.4496	2949	86.2345	2949	86.7521	2949	86.9019	2949	85.4687
2948	86.5988	2948	86.3625	2948	86.8791	2948	87.0447	2948	85.6046
2947	86.7465	2947	86.4711	2947	87.0017	2947	87.176	2947	85.7189
2946	86.877	2946	86.5745	2946	87.1136	2946	87.3065	2946	85.8209
2945	86.9882	2945	86.683	2945	87.2122	2945	87.4387	2945	85.9274
2944	87.0908	2944	86.7999	2944	87.3063	2944	87.5697	2944	86.0483
2943	87.1935	2943	86.9205	2943	87.4113	2943	87.6967	2943	86.1776
2942	87.296	2942	87.0311	2942	87.5356	2942	87.8149	2942	86.2975
2941	87.3972	2941	87.1206	2941	87.6766	2941	87.9215	2941	86.396
2940	87.501	2940	87.196	2940	87.825	2940	88.0252	2940	86.4808
2939	87.6047	2939	87.2776	2939	87.9668	2939	88.1374	2939	86.5736
2938	87.6947	2938	87.3767	2938	88.0873	2938	88.2528	2938	86.6902
2937	87.7643	2937	87.4873	2937	88.1818	2937	88.3555	2937	86.8295
2936	87.8303	2936	87.6025	2936	88.2621	2936	88.4469	2936	86.9764
2935	87.9172	2935	87.7276	2935	88.3438	2935	88.5461	2935	87.1102
2934	88.0309	2934	87.8691	2934	88.4331	2934	88.6616	2934	87.2135
2933	88.1586	2933	88.0172	2933	88.531	2933	88.7814	2933	87.2832
2932	88.2856	2932	88.1507	2932	88.6399	2932	88.895	2932	87.334
2931	88.3996	2931	88.2584	2931	88.7564	2931	89.0023	2931	87.3863
2930	88.4887	2930	88.3513	2930	88.8641	2930	89.0971	2930	87.4526
2929	88.555	2929	88.4502	2929	88.949	2929	89.1666	2929	87.5382
2928	88.6251	2928	88.5621	2928	89.0165	2928	89.2156	2928	87.6452
2927	88.7261	2927	88.6687	2927	89.0834	2927	89.2686	2927	87.7674
2926	88.853	2926	88.7437	2926	89.1585	2926	89.3431	2926	87.8853
2925	88.9762	2925	88.7841	2925	89.2434	2925	89.438	2925	87.9805
2924	89.0793	2924	88.8167	2924	89.3424	2924	89.5501	2924	88.0541
2923	89.1727	2923	88.8686	2923	89.4561	2923	89.6784	2923	88.1246
2922	89.2689	2922	88.9387	2922	89.5714	2922	89.8102	2922	88.2092
2921	89.365	2921	89.0085	2921	89.674	2921	89.9255	2921	88.3153
2920	89.4555	2920	89.0734	2920	89.7683	2920	90.0217	2920	88.4396
2919	89.5453	2919	89.1497	2919	89.8723	2919	90.1123	2919	88.5642
2918	89.6426	2918	89.2528	2918	89.9935	2918	90.1989	2918	88.6632
2917	89.7486	2917	89.3798	2917	90.1236	2917	90.2708	2917	88.7271
2916	89.8588	2916	89.514	2916	90.2507	2916	90.3324	2916	88.7811
2915	89.9666	2915	89.6367	2915	90.3643	2915	90.4067	2915	88.8631
2914	90.0643	2914	89.7361	2914	90.4536	2914	90.5044	2914	88.9846
2913	90.1479	2913	89.8137	2913	90.5168	2913	90.613	2913	89.1243
2912	90.2226	2912	89.8846	2912	90.5723	2912	90.7208	2912	89.2551
2911	90.2973	2911	89.9641	2911	90.6444	2911	90.8261	2911	89.3639
2910	90.3744	2910	90.0554	2910	90.7378	2910	90.9214	2910	89.4499
2909	90.4502	2909	90.1525	2909	90.8334	2909	90.9932	2909	89.5187
2908	90.5215	2908	90.2491	2908	90.9094	2908	91.0433	2908	89.5823
2907	90.5858	2907	90.3391	2907	90.9601	2907	91.0883	2907	89.6503
2906	90.644	2906	90.4155	2906	90.9988	2906	91.1374	2906	89.7197
2905	90.7082	2905	90.4817	2905	91.0513	2905	91.1914	2905	89.7821
2904	90.7995	2904	90.5553	2904	91.1385	2904	91.2648	2904	89.8413
2903	90.9223	2903	90.6492	2903	91.2543	2903	91.3764	2903	89.9118
2902	91.0489	2902	90.751	2902	91.3666	2902	91.5127	2902	90.0011
2901	91.1456	2901	90.8379	2901	91.4507	2901	91.63	2901	90.1032
2900	91.2114	2900	90.9094	2900	91.5143	2900	91.7051	2900	90.21
2899	91.2742	2899	90.9889	2899	91.5795	2899	91.7571	2899	90.316
2898	91.3524	2898	91.0927	2898	91.6531	2898	91.8151	2898	90.4119
2897	91.4387	2897	91.2091	2897	91.7288	2897	91.8872	2897	90.4855
2896	91.5189	2896	91.312	2896	91.81	2896	91.9704	2896	90.5363
2895	91.5914	2895	91.3835	2895	91.9051	2895	92.0627	2895	90.5778
2894	91.6598	2894	91.4243	2894	92.0058	2894	92.1547	2894	90.6268
2893	91.7243	2893	91.4523	2893	92.0907	2893	92.2323	2893	90.6931
2892	91.7879	2892	91.4924	2892	92.1529	2892	92.3012	2892	90.7802
2891	91.8612	2891	91.5577	2891	92.2084	2891	92.3862	2891	90.883
2890	91.951	2890	91.6361	2890	92.2752	2890	92.4969	2890	90.9859
2889	92.0502	2889	91.7041	2889	92.357	2889	92.6114	2889	91.0725
2888	92.1421	2888	91.754	2888	92.4475	2888	92.704	2888	91.1398
2887	92.2148	2887	91.8004	2887	92.5358	2887	92.7685	2887	91.1964
2886	92.2667	2886	91.8614	2886	92.6065	2886	92.8082	2886	91.2489
2885	92.3038	2885	91.9432	2885	92.6496	2885	92.826	2885	91.2998
2884	92.3341	2884	92.0408	2884	92.6739	2884	92.8369	2884	91.3538
2883	92.3638	2883	92.1408	2883	92.7044	2883	92.8686	2883	91.4156
2882	92.3992	2882	92.2235	2882	92.7617	2882	92.9346	2882	91.4829
2881	92.4489	2881	92.2748	2881	92.8484	2881	93.0216	2881	91.552
2880	92.5183	2880	92.3027	2880	92.9515	2880	93.1079	2880	91.6265
2879	92.6002	2879	92.3345	2879	93.0501	2879	93.1835	2879	91.7081
2878	92.6783	2878	92.3918	2878	93.1262	2878	93.2462	2878	91.7828
2877	92.7439	2877	92.4734	2877	93.1761	2877	93.2957	2877	91.8335
2876	92.8017	2876	92.5609	2876	93.2123	2876	93.3403	2876	91.866
2875	92.8578	2875	92.6335	2875	93.2464	2875	93.3908	2875	91.908
2874	92.9115	2874	92.6805	2874	93.2774	2874	93.4441	2874	91.9781
2873	92.9624	2873	92.7089	2873	93.3021	2873	93.4879	2873	92.0695
2872	93.0142	2872	92.7415	2872	93.3282	2872	93.5244	2872	92.1643
2871	93.0668	2871	92.7992	2871	93.368	2871	93.5728	2871	92.2509
2870	93.116	2870	92.8829	2870	93.4271	2870	93.6438	2870	92.3234
2869	93.1669	2869	92.9756	2869	93.5047	2869	93.7284	2869	92.3798
2868	93.2346	2868	93.0596	2868	93.5974	2868	93.8141	2868	92.428
2867	93.3229	2867	93.1257	2867	93.6917	2867	93.8955	2867	92.4807
2866	93.415	2866	93.1724	2866	93.7664	2866	93.9688	2866	92.5388
2865	93.4949	2865	93.2072	2865	93.8159	2865	94.0325	2865	92.5884
2864	93.5649	2864	93.2465	2864	93.8614	2864	94.0948	2864	92.6195
2863	93.6318	2863	93.301	2863	93.9237	2863	94.163	2863	92.6391
2862	93.6897	2862	93.3624	2862	93.9961	2862	94.2272	2862	92.6618
2861	93.7335	2861	93.4151	2861	94.0599	2861	94.2749	2861	92.6955
2860	93.7747	2860	93.4576	2860	94.1145	2860	94.316	2860	92.7413
2859	93.8256	2859	93.5023	2859	94.1732	2859	94.3675	2859	92.7979
2858	93.8806	2858	93.5533	2858	94.2378	2858	94.42	2858	92.861
2857	93.9287	2857	93.5988	2857	94.2976	2857	94.4506	2857	92.9231
2856	93.9747	2856	93.629	2856	94.3479	2856	94.4644	2856	92.981
2855	94.0296	2855	93.6482	2855	94.3917	2855	94.4928	2855	93.039
2854	94.0888	2854	93.6702	2854	94.4265	2854	94.5465	2854	93.1006
2853	94.1376	2853	93.7061	2853	94.4459	2853	94.6042	2853	93.1602
2852	94.174	2852	93.759	2852	94.452	2852	94.65	2852	93.204
2851	94.2065	2851	93.8225	2851	94.4523	2851	94.6934	2851	93.2203
2850	94.2377	2850	93.8837	2850	94.4499	2850	94.7423	2850	93.2143
2849	94.2639	2849	93.9345	2849	94.4507	2849	94.7874	2849	93.2158
2848	94.286	2848	93.9786	2848	94.4704	2848	94.8248	2848	93.2613
2847	94.309	2847	94.0223	2847	94.5199	2847	94.8672	2847	93.3574
2846	94.3354	2846	94.0645	2846	94.5919	2846	94.9233	2846	93.4686
2845	94.3707	2845	94.1025	2845	94.673	2845	94.9854	2845	93.5524
2844	94.4232	2844	94.1412	2844	94.759	2844	95.0439	2844	93.6043
2843	94.4856	2843	94.1865	2843	94.8434	2843	95.0951	2843	93.6513
2842	94.5313	2842	94.2348	2842	94.9054	2842	95.131	2842	93.7081
2841	94.5468	2841	94.2811	2841	94.9329	2841	95.1456	2841	93.759
2840	94.5578	2840	94.3304	2840	94.9478	2840	95.1551	2840	93.7879
2839	94.6012	2839	94.3897	2839	94.9859	2839	95.1888	2839	93.8061
2838	94.6812	2838	94.4529	2838	95.0546	2838	95.2536	2838	93.839
2837	94.7698	2837	94.5085	2837	95.1305	2837	95.3276	2837	93.8968
2836	94.8433	2836	94.5575	2836	95.1922	2836	95.392	2836	93.9669
2835	94.895	2835	94.6081	2835	95.2338	2835	95.4454	2835	94.0322
2834	94.9234	2834	94.6556	2834	95.2541	2834	95.4884	2834	94.0851
2833	94.9336	2833	94.6866	2833	95.2572	2833	95.5201	2833	94.1275
2832	94.9492	2832	94.7029	2832	95.2656	2832	95.5549	2832	94.1637
2831	94.9979	2831	94.7229	2831	95.307	2831	95.6159	2831	94.1956
2830	95.0795	2830	94.7559	2830	95.3831	2830	95.7006	2830	94.2229
2829	95.1637	2829	94.7919	2829	95.4671	2829	95.7769	2829	94.247
2828	95.2223	2828	94.8211	2828	95.5334	2828	95.8227	2828	94.2722
2827	95.2498	2827	94.8486	2827	95.5748	2827	95.847	2827	94.3012
2826	95.2567	2826	94.8831	2826	95.5953	2826	95.8684	2826	94.3322
2825	95.2579	2825	94.9243	2825	95.6028	2825	95.8952	2825	94.3645
2824	95.2707	2824	94.9699	2824	95.6134	2824	95.9317	2824	94.4023
2823	95.3057	2823	95.0232	2823	95.6419	2823	95.9814	2823	94.4475
2822	95.3568	2822	95.0846	2822	95.686	2822	96.0332	2822	94.4921
2821	95.4079	2821	95.1427	2821	95.7316	2821	96.0657	2821	94.5239
2820	95.45	2820	95.1833	2820	95.7723	2820	96.0749	2820	94.5411
2819	95.4822	2819	95.2049	2819	95.8117	2819	96.0792	2819	94.5546
2818	95.5035	2818	95.2181	2818	95.8484	2818	96.0921	2818	94.5782
2817	95.5149	2817	95.234	2817	95.8767	2817	96.11	2817	94.6195
2816	95.5279	2816	95.2553	2816	95.9001	2816	96.1309	2816	94.6762
2815	95.5549	2815	95.2784	2815	95.9292	2815	96.163	2815	94.7367
2814	95.5948	2814	95.3016	2814	95.9656	2814	96.2092	2814	94.788
2813	95.6408	2813	95.3323	2813	96.0026	2813	96.2613	2813	94.8278
2812	95.6952	2812	95.3805	2812	96.0408	2812	96.3156	2812	94.8651
2811	95.7622	2811	95.4444	2811	96.0877	2811	96.3735	2811	94.9072
2810	95.8321	2810	95.5065	2810	96.141	2810	96.4249	2810	94.9491
2809	95.8861	2809	95.5502	2809	96.1878	2809	96.4532	2809	94.9826
2808	95.9164	2808	95.5766	2808	96.2213	2808	96.4619	2808	95.0068
2807	95.928	2807	95.5958	2807	96.2451	2807	96.4748	2807	95.0251
2806	95.9269	2806	95.6104	2806	96.2628	2806	96.5042	2806	95.0383
2805	95.9207	2805	95.6182	2805	96.2763	2805	96.5391	2805	95.0488
2804	95.9254	2804	95.6277	2804	96.2932	2804	96.5683	2804	95.0652
2803	95.954	2803	95.6578	2803	96.3206	2803	96.5944	2803	95.0922
2802	96.0008	2802	95.7161	2802	96.3529	2802	96.6186	2802	95.1232
2801	96.0501	2801	95.7876	2801	96.3796	2801	96.637	2801	95.1495
2800	96.0945	2800	95.8473	2800	96.4011	2800	96.6559	2800	95.1742
2799	96.1316	2799	95.8793	2799	96.4242	2799	96.689	2799	95.204
2798	96.1504	2798	95.8865	2798	96.4445	2798	96.7323	2798	95.2384
2797	96.1441	2797	95.8871	2797	96.4533	2797	96.766	2797	95.2742
2796	96.1318	2796	95.9016	2796	96.4596	2796	96.7866	2796	95.3162
2795	96.1469	2795	95.9344	2795	96.488	2795	96.8148	2795	95.3675
2794	96.201	2794	95.9694	2794	96.548	2794	96.8636	2794	95.4142
2793	96.2731	2793	95.9898	2793	96.6207	2793	96.9196	2793	95.436
2792	96.338	2792	95.9987	2792	96.6808	2792	96.9649	2792	95.4335
2791	96.3884	2791	96.0149	2791	96.7205	2791	96.9978	2791	95.431
2790	96.4301	2790	96.0487	2790	96.7479	2790	97.0227	2790	95.452
2789	96.4689	2789	96.0929	2789	96.7734	2789	97.0382	2789	95.4983
2788	96.5068	2788	96.1342	2788	96.8022	2788	97.0464	2788	95.5545
2787	96.5398	2787	96.1649	2787	96.8328	2787	97.057	2787	95.6021
2786	96.5579	2786	96.1847	2786	96.8596	2786	97.0726	2786	95.6301
2785	96.556	2785	96.1977	2785	96.8793	2785	97.0847	2785	95.6403
2784	96.5429	2784	96.2109	2784	96.8939	2784	97.0885	2784	95.6446
2783	96.5319	2783	96.228	2783	96.9039	2783	97.0898	2783	95.6541
2782	96.5272	2782	96.2462	2782	96.9052	2782	97.0939	2782	95.6686
2781	96.5289	2781	96.2624	2781	96.8996	2781	97.1033	2781	95.6819
2780	96.5441	2780	96.2797	2780	96.9004	2780	97.1255	2780	95.6929
2779	96.579	2779	96.3014	2779	96.919	2779	97.1668	2779	95.7046
2778	96.6242	2778	96.3243	2778	96.9518	2778	97.2174	2778	95.7186
2777	96.6646	2777	96.3451	2777	96.9885	2777	97.2595	2777	95.7361
2776	96.6984	2776	96.3698	2776	97.0255	2776	97.2893	2776	95.7626
2775	96.733	2775	96.4065	2775	97.0596	2775	97.3134	2775	95.801
2774	96.7661	2774	96.4525	2774	97.0786	2774	97.3256	2774	95.8446
2773	96.7898	2773	96.4957	2773	97.0763	2773	97.3127	2773	95.8829
2772	96.8073	2772	96.5281	2772	97.0678	2772	97.2845	2772	95.9126
2771	96.8298	2771	96.5493	2771	97.0761	2771	97.2741	2771	95.9367
2770	96.8567	2770	96.5607	2770	97.1054	2770	97.3006	2770	95.9565
2769	96.8765	2769	96.5654	2769	97.1416	2769	97.3503	2769	95.9728
2768	96.8872	2768	96.5704	2768	97.1747	2768	97.399	2768	95.9892
2767	96.9005	2767	96.5804	2767	97.2067	2767	97.4362	2767	96.0073
2766	96.9232	2766	96.5924	2766	97.2403	2766	97.4623	2766	96.0242
2765	96.9488	2765	96.6033	2765	97.2735	2765	97.4828	2765	96.04
2764	96.9709	2764	96.6183	2764	97.3032	2764	97.5081	2764	96.0619
2763	96.9919	2763	96.643	2763	97.3244	2763	97.5426	2763	96.0924
2762	97.0166	2762	96.6705	2762	97.3306	2762	97.5728	2762	96.1217
2761	97.045	2761	96.6876	2761	97.3245	2761	97.5827	2761	96.1414
2760	97.0741	2760	96.6907	2760	97.3226	2760	97.5808	2760	96.1583
2759	97.1	2759	96.6877	2759	97.3377	2759	97.591	2759	96.1826
2758	97.1187	2758	96.687	2758	97.364	2758	97.618	2758	96.2094
2757	97.1302	2757	96.6944	2757	97.3888	2757	97.642	2757	96.2249
2756	97.1399	2756	96.7138	2756	97.4095	2756	97.6506	2756	96.2269
2755	97.1491	2755	96.7419	2755	97.4262	2755	97.6519	2755	96.2261
2754	97.1511	2754	96.7656	2754	97.43	2754	97.655	2754	96.2316
2753	97.1448	2753	96.7782	2753	97.4157	2753	97.6602	2753	96.2457
2752	97.1425	2752	96.7922	2752	97.3989	2752	97.6711	2752	96.2717
2751	97.156	2751	96.8239	2751	97.4023	2751	97.6939	2751	96.3113
2750	97.1824	2750	96.8662	2750	97.4301	2750	97.7225	2750	96.3544
2749	97.214	2749	96.8948	2749	97.4698	2749	97.7422	2749	96.3833
2748	97.2506	2748	96.8979	2748	97.5114	2748	97.7536	2748	96.3889
2747	97.2916	2747	96.8892	2747	97.5497	2747	97.7718	2747	96.3765
2746	97.3248	2746	96.8873	2746	97.5772	2746	97.8008	2746	96.359
2745	97.3398	2745	96.8969	2745	97.5921	2745	97.828	2745	96.3516
2744	97.3437	2744	96.9151	2744	97.6061	2744	97.8465	2744	96.3656
2743	97.3485	2743	96.9418	2743	97.6272	2743	97.8604	2743	96.3981
2742	97.3514	2742	96.9772	2742	97.6434	2742	97.8684	2742	96.4299
2741	97.344	2741	97.0157	2741	97.6416	2741	97.8643	2741	96.443
2740	97.3321	2740	97.0467	2740	97.6347	2740	97.8551	2740	96.4398
2739	97.329	2739	97.0631	2739	97.6455	2739	97.8579	2739	96.437
2738	97.3359	2738	97.0654	2738	97.6725	2738	97.8751	2738	96.4469
2737	97.3465	2737	97.0634	2737	97.6948	2737	97.8947	2737	96.4725
2736	97.3661	2736	97.0717	2736	97.7073	2736	97.9143	2736	96.5129
2735	97.4026	2735	97.0981	2735	97.7237	2735	97.9417	2735	96.5609
2734	97.4448	2734	97.1361	2734	97.7482	2734	97.9721	2734	96.6001
2733	97.4701	2733	97.171	2733	97.7688	2733	97.9908	2733	96.6162
2732	97.4758	2732	97.1907	2732	97.782	2732	98.0012	2732	96.6114
2731	97.4825	2731	97.1913	2731	97.7989	2731	98.0227	2731	96.5983
2730	97.5045	2730	97.1784	2730	97.8218	2730	98.0557	2730	96.5841
2729	97.5329	2729	97.1671	2729	97.8355	2729	98.0769	2729	96.5729
2728	97.5533	2728	97.1722	2728	97.8312	2728	98.0764	2728	96.5732
2727	97.5634	2727	97.1923	2727	97.821	2727	98.0723	2727	96.5905
2726	97.5708	2726	97.2085	2726	97.8206	2726	98.0797	2726	96.6149
2725	97.5827	2725	97.2067	2725	97.8318	2725	98.0909	2725	96.6307
2724	97.6029	2724	97.1943	2724	97.8475	2724	98.095	2724	96.6363
2723	97.6272	2723	97.1877	2723	97.8629	2723	98.0971	2723	96.6431
2722	97.6443	2722	97.1903	2722	97.8763	2722	98.1041	2722	96.6574
2721	97.6462	2721	97.1949	2721	97.8879	2721	98.1131	2721	96.6753
2720	97.6385	2720	97.2	2720	97.9025	2720	98.123	2720	96.6925
2719	97.631	2719	97.2117	2719	97.9214	2719	98.1389	2719	96.7073
2718	97.6248	2718	97.2331	2718	97.9345	2718	98.1581	2718	96.717
2717	97.6171	2717	97.2628	2717	97.9295	2717	98.1688	2717	96.7232
2716	97.6142	2716	97.2991	2716	97.9115	2716	98.1712	2716	96.7378
2715	97.6243	2715	97.3363	2715	97.8999	2715	98.1809	2715	96.7701
2714	97.644	2714	97.3602	2714	97.9069	2714	98.206	2714	96.8096
2713	97.6642	2713	97.3603	2713	97.9293	2713	98.2365	2713	96.8354
2712	97.6849	2712	97.3435	2712	97.9585	2712	98.262	2712	96.8415
2711	97.7099	2711	97.3271	2711	97.9871	2711	98.2818	2711	96.8392
2710	97.7327	2710	97.3214	2710	98.0054	2710	98.292	2710	96.8381
2709	97.7409	2709	97.3272	2709	98.0074	2709	98.2846	2709	96.8374
2708	97.734	2708	97.345	2708	98.0012	2708	98.266	2708	96.8369
2707	97.724	2707	97.3745	2707	98.002	2707	98.259	2707	96.8411
2706	97.7194	2706	97.4091	2706	98.0144	2706	98.2749	2706	96.8509
2705	97.7204	2705	97.4412	2705	98.0281	2705	98.3006	2705	96.8618
2704	97.726	2704	97.471	2704	98.0323	2704	98.317	2704	96.8733
2703	97.7341	2703	97.4989	2703	98.0259	2703	98.3173	2703	96.8887
2702	97.7401	2702	97.5151	2702	98.015	2702	98.305	2702	96.9062
2701	97.7453	2701	97.5106	2701	98.0104	2701	98.2895	2701	96.9192
2700	97.7612	2700	97.4952	2700	98.0238	2700	98.2876	2700	96.9273
2699	97.7922	2699	97.4901	2699	98.0545	2699	98.3111	2699	96.9371
2698	97.8223	2698	97.5015	2698	98.0852	2698	98.3479	2698	96.9515
2697	97.833	2697	97.5157	2697	98.0996	2697	98.3726	2697	96.9662
2696	97.8275	2696	97.5197	2696	98.1016	2696	98.3774	2696	96.9758
2695	97.8236	2695	97.515	2695	98.106	2695	98.3767	2695	96.9771
2694	97.8284	2694	97.5088	2694	98.1181	2694	98.382	2694	96.9661
2693	97.8382	2693	97.5039	2693	98.1338	2693	98.3913	2693	96.9439
2692	97.8546	2692	97.4993	2692	98.153	2692	98.4042	2692	96.9236
2691	97.8833	2691	97.4945	2691	98.1778	2691	98.4246	2691	96.9216
2690	97.9169	2690	97.49	2690	98.2013	2690	98.4438	2690	96.9403
2689	97.9391	2689	97.4899	2689	98.2112	2689	98.4425	2689	96.9676
2688	97.9444	2688	97.5026	2688	98.2064	2688	98.4183	2688	96.9907
2687	97.9409	2687	97.5328	2687	98.1965	2687	98.3929	2687	97.0044
2686	97.9346	2686	97.573	2686	98.1894	2686	98.3854	2686	97.01
2685	97.9267	2685	97.6103	2685	98.1889	2685	98.3937	2685	97.014
2684	97.9227	2684	97.6386	2684	98.1989	2684	98.4069	2684	97.0268
2683	97.9297	2683	97.6578	2683	98.2171	2683	98.4194	2683	97.0526
2682	97.9449	2682	97.6658	2682	98.2311	2682	98.4279	2682	97.0827
2681	97.9586	2681	97.6616	2681	98.2323	2681	98.4313	2681	97.1061
2680	97.9668	2680	97.6538	2680	98.2293	2680	98.4379	2680	97.1229
2679	97.9698	2679	97.6531	2679	98.2337	2679	98.4565	2679	97.137
2678	97.9631	2678	97.6592	2678	98.2406	2678	98.4781	2678	97.143
2677	97.9455	2677	97.663	2677	98.238	2677	98.4848	2677	97.1323
2676	97.9306	2676	97.6614	2676	98.2299	2676	98.4762	2676	97.1097
2675	97.9353	2675	97.6573	2675	98.232	2675	98.4713	2675	97.0913
2674	97.958	2674	97.6492	2674	98.2479	2674	98.4805	2674	97.0846
2673	97.9822	2673	97.631	2673	98.2659	2673	98.4951	2673	97.0831
2672	97.9987	2672	97.6062	2672	98.2773	2672	98.5057	2672	97.0789
2671	98.0088	2671	97.5898	2671	98.2827	2671	98.5133	2671	97.0699
2670	98.0119	2670	97.5932	2670	98.2832	2670	98.5176	2670	97.0574
2669	98.0059	2669	97.6127	2669	98.2784	2669	98.5141	2669	97.0463
2668	97.999	2668	97.6358	2668	98.2739	2668	98.5074	2668	97.048
2667	98.0045	2667	97.6531	2667	98.276	2667	98.5112	2667	97.0708
2666	98.0212	2666	97.6626	2666	98.2823	2666	98.529	2666	97.1075
2665	98.0344	2665	97.6666	2665	98.2874	2665	98.5495	2665	97.141
2664	98.0358	2664	97.6671	2664	98.294	2664	98.5617	2664	97.1613
2663	98.0301	2663	97.6637	2663	98.3057	2663	98.5635	2663	97.1693
2662	98.0252	2662	97.6583	2662	98.316	2662	98.555	2662	97.1681
2661	98.0265	2661	97.6606	2661	98.3165	2661	98.5407	2661	97.1601
2660	98.0375	2660	97.6807	2660	98.3128	2660	98.5355	2660	97.1525
2659	98.0542	2659	97.7133	2659	98.3153	2659	98.5512	2659	97.152
2658	98.0623	2658	97.7372	2658	98.3237	2658	98.5779	2658	97.1568
2657	98.0554	2657	97.7396	2657	98.3332	2657	98.5959	2657	97.1612
2656	98.0493	2656	97.7319	2656	98.3507	2656	98.6032	2656	97.1676
2655	98.0646	2655	97.7346	2655	98.3835	2655	98.611	2655	97.1804
2654	98.0964	2654	97.7524	2654	98.4182	2654	98.617	2654	97.193
2653	98.121	2653	97.7738	2653	98.4305	2653	98.6089	2653	97.1939
2652	98.1277	2652	97.7879	2652	98.4166	2652	98.5942	2652	97.1865
2651	98.1252	2651	97.7905	2651	98.3936	2651	98.5959	2651	97.1878
2650	98.1211	2650	97.7815	2650	98.3723	2650	98.617	2650	97.2045
2649	98.115	2649	97.7672	2649	98.3523	2649	98.6336	2649	97.2259
2648	98.1129	2648	97.7611	2648	98.3403	2648	98.6296	2648	97.2413
2647	98.1254	2647	97.7712	2647	98.3497	2647	98.6128	2647	97.2514
2646	98.1496	2646	97.7911	2646	98.377	2646	98.5941	2646	97.2601
2645	98.1698	2645	97.8118	2645	98.401	2645	98.5787	2645	97.2683
2644	98.1787	2644	97.8336	2644	98.4103	2644	98.579	2644	97.2788
2643	98.1817	2643	97.8566	2643	98.4119	2643	98.6072	2643	97.2955
2642	98.1813	2642	97.8693	2642	98.4134	2642	98.649	2642	97.3136
2641	98.1767	2641	97.8643	2641	98.4148	2641	98.675	2641	97.321
2640	98.1765	2640	97.853	2640	98.4201	2640	98.6814	2640	97.3117
2639	98.1883	2639	97.8492	2639	98.4344	2639	98.6883	2639	97.2888
2638	98.1989	2638	97.8476	2638	98.4496	2638	98.6973	2638	97.2576
2637	98.1873	2637	97.837	2637	98.4534	2637	98.6881	2637	97.2266
2636	98.1595	2636	97.8246	2636	98.4532	2636	98.6636	2636	97.2111
2635	98.1433	2635	97.8254	2635	98.4664	2635	98.6544	2635	97.2213
2634	98.1498	2634	97.8368	2634	98.4878	2634	98.6684	2634	97.2456
2633	98.1619	2633	97.8475	2633	98.4911	2633	98.6773	2633	97.2628
2632	98.1655	2632	97.8619	2632	98.4662	2632	98.6676	2632	97.2698
2631	98.1632	2631	97.8888	2631	98.4298	2631	98.6627	2631	97.2811
2630	98.1567	2630	97.9128	2630	98.3974	2630	98.6774	2630	97.3022
2629	98.1427	2629	97.9057	2629	98.3706	2629	98.6898	2629	97.3223
2628	98.1303	2628	97.8662	2628	98.3542	2628	98.6803	2628	97.3345
2627	98.1372	2627	97.8217	2627	98.3604	2627	98.6635	2627	97.3442
2626	98.1608	2626	97.7933	2626	98.3889	2626	98.6577	2626	97.3544
2625	98.1781	2625	97.7854	2625	98.4243	2625	98.657	2625	97.3601
2624	98.18	2624	97.8048	2624	98.456	2624	98.6525	2624	97.3599
2623	98.1836	2623	97.8568	2623	98.4804	2623	98.6504	2623	97.3583
2622	98.2028	2622	97.9192	2622	98.4872	2622	98.6528	2622	97.3538
2621	98.2306	2621	97.9509	2621	98.4689	2621	98.651	2621	97.3401
2620	98.2533	2620	97.9365	2620	98.4424	2620	98.6502	2620	97.323
2619	98.2629	2619	97.899	2619	98.4362	2619	98.6694	2619	97.3181
2618	98.255	2618	97.8673	2618	98.4549	2618	98.7021	2618	97.3287
2617	98.2356	2617	97.8535	2617	98.4826	2617	98.7162	2617	97.3406
2616	98.2303	2616	97.8613	2616	98.5139	2616	98.7039	2616	97.3421
2615	98.2578	2615	97.8869	2615	98.5508	2615	98.6939	2615	97.3339
2614	98.2951	2614	97.9061	2614	98.5734	2614	98.7008	2614	97.3192
2613	98.296	2613	97.8901	2613	98.5516	2613	98.7044	2613	97.2992
2612	98.2489	2612	97.8435	2612	98.491	2612	98.6938	2612	97.2822
2611	98.1925	2611	97.8054	2611	98.4366	2611	98.6899	2611	97.2821
2610	98.1709	2610	97.8063	2610	98.4236	2610	98.7072	2610	97.3062
2609	98.195	2609	97.8414	2609	98.4491	2609	98.7306	2609	97.3518
2608	98.2437	2608	97.8872	2608	98.4876	2608	98.7441	2608	97.411
2607	98.2802	2607	97.9214	2607	98.5087	2607	98.7444	2607	97.4683
2606	98.2722	2606	97.9278	2606	98.4869	2606	98.72	2606	97.4991
2605	98.2232	2605	97.908	2605	98.4266	2605	98.6585	2605	97.4869
2604	98.1795	2604	97.8894	2604	98.3737	2604	98.5862	2604	97.4403
2603	98.1808	2603	97.8979	2603	98.3693	2603	98.5553	2603	97.382
2602	98.2129	2602	97.9214	2602	98.3983	2602	98.5805	2602	97.3291
2601	98.2343	2601	97.9239	2601	98.4143	2601	98.6294	2601	97.2948
2600	98.2353	2600	97.8977	2600	98.4035	2600	98.6767	2600	97.2926
2599	98.2346	2599	97.8732	2599	98.3869	2599	98.7202	2599	97.3206
2598	98.2348	2598	97.8746	2598	98.3742	2598	98.7429	2598	97.3563
2597	98.2258	2597	97.8941	2597	98.3629	2597	98.7203	2597	97.3871
2596	98.2219	2596	97.9133	2596	98.3727	2596	98.6729	2596	97.4288
2595	98.2467	2595	97.9254	2595	98.4259	2595	98.653	2595	97.4894
2594	98.2864	2594	97.9309	2594	98.4957	2594	98.67	2594	97.5372
2593	98.3024	2593	97.9316	2593	98.5256	2593	98.6873	2593	97.5375
2592	98.2909	2592	97.9358	2592	98.5058	2592	98.6962	2592	97.5092
2591	98.2838	2591	97.9476	2591	98.4838	2591	98.7248	2591	97.5064
2590	98.2909	2590	97.955	2590	98.4929	2590	98.7646	2590	97.5509
2589	98.2893	2589	97.945	2589	98.5168	2589	98.7642	2589	97.6147
2588	98.2716	2588	97.9266	2588	98.5297	2588	98.7155	2588	97.663
2587	98.2589	2587	97.9169	2587	98.5291	2587	98.6738	2587	97.6825
2586	98.2572	2586	97.9103	2586	98.5186	2586	98.6691	2586	97.6708
2585	98.2459	2585	97.8846	2585	98.4957	2585	98.6659	2585	97.6292
2584	98.2174	2584	97.8332	2584	98.4651	2584	98.6364	2584	97.5696
2583	98.1907	2583	97.7716	2583	98.4345	2583	98.6081	2583	97.5067
2582	98.1776	2582	97.7195	2582	98.399	2582	98.6136	2582	97.4449
2581	98.1699	2581	97.6979	2581	98.3581	2581	98.6505	2581	97.3882
2580	98.1642	2580	97.7302	2580	98.3363	2580	98.7102	2580	97.3478
2579	98.1687	2579	97.8149	2579	98.3495	2579	98.7855	2579	97.3237
2578	98.182	2578	97.9079	2578	98.3694	2578	98.8341	2578	97.2975
2577	98.1937	2577	97.96	2577	98.3616	2577	98.8005	2577	97.2637
2576	98.2015	2576	97.9683	2576	98.3438	2576	98.6965	2576	97.2445
2575	98.2004	2575	97.9622	2575	98.3574	2575	98.5971	2575	97.2465
2574	98.1686	2574	97.9521	2574	98.397	2574	98.5411	2574	97.2334
2573	98.1013	2573	97.9233	2573	98.4206	2573	98.5038	2573	97.1784
2572	98.0448	2572	97.8727	2572	98.4179	2572	98.4768	2572	97.1181
2571	98.0524	2571	97.8186	2571	98.4118	2571	98.4935	2571	97.1117
2570	98.1128	2570	97.7783	2570	98.4026	2570	98.5524	2570	97.1637
2569	98.1618	2569	97.7627	2569	98.3669	2569	98.5896	2569	97.2298
2568	98.1618	2568	97.7836	2568	98.3097	2568	98.5653	2568	97.2809
2567	98.1331	2567	97.838	2567	98.2631	2567	98.5156	2567	97.3169
2566	98.1132	2566	97.8932	2566	98.2387	2566	98.491	2566	97.3333
2565	98.1226	2565	97.9168	2565	98.2297	2565	98.5009	2565	97.3223
2564	98.1606	2564	97.9128	2564	98.2471	2564	98.5359	2564	97.3033
2563	98.1982	2563	97.9058	2563	98.2998	2563	98.5836	2563	97.3081
2562	98.1887	2562	97.9035	2562	98.3502	2562	98.604	2562	97.3394
2561	98.1206	2561	97.8998	2561	98.3489	2561	98.5563	2561	97.3758
2560	98.0466	2560	97.8965	2560	98.3073	2560	98.4653	2560	97.4049
2559	98.0241	2559	97.891	2559	98.2792	2559	98.4009	2559	97.419
2558	98.0505	2558	97.8643	2558	98.2816	2558	98.3856	2558	97.4005
2557	98.0927	2557	97.8116	2557	98.2927	2557	98.3879	2557	97.3538
2556	98.1482	2556	97.7641	2556	98.3146	2556	98.4063	2556	97.3319
2555	98.2254	2555	97.7461	2555	98.3709	2555	98.4759	2555	97.3807
2554	98.2923	2554	97.7357	2554	98.4448	2554	98.5802	2554	97.4674
2553	98.3081	2553	97.7073	2553	98.4876	2553	98.6434	2553	97.5113
2552	98.2874	2552	97.6867	2552	98.4903	2552	98.6331	2552	97.4757
2551	98.2733	2551	97.7179	2551	98.4852	2551	98.5966	2551	97.3908
2550	98.2621	2550	97.7906	2550	98.4789	2550	98.576	2550	97.3013
2549	98.2183	2549	97.8469	2549	98.4471	2549	98.5664	2549	97.2405
2548	98.1505	2548	97.8504	2548	98.3961	2548	98.5709	2548	97.2375
2547	98.1084	2547	97.812	2547	98.3667	2547	98.6157	2547	97.2939
2546	98.1098	2546	97.7611	2546	98.3718	2546	98.6862	2546	97.3565
2545	98.1251	2545	97.7325	2545	98.3856	2545	98.7238	2545	97.3598
2544	98.129	2544	97.7601	2544	98.3928	2544	98.7074	2544	97.302
2543	98.118	2543	97.8411	2543	98.395	2543	98.672	2543	97.2388
2542	98.0875	2542	97.917	2542	98.3734	2542	98.6364	2542	97.2109
2541	98.04	2541	97.9321	2541	98.3063	2541	98.5885	2541	97.2127
2540	98.0068	2540	97.8972	2540	98.2201	2540	98.5428	2540	97.2212
2539	98.011	2539	97.8578	2539	98.1634	2539	98.5302	2539	97.2148
2538	98.0269	2538	97.8215	2538	98.1356	2538	98.5254	2538	97.1735
2537	98.0199	2537	97.7615	2537	98.1004	2537	98.4742	2537	97.1029
2536	98.0065	2536	97.6743	2536	98.0647	2536	98.3991	2536	97.0494
2535	98.0226	2535	97.5876	2535	98.0785	2535	98.3832	2535	97.0547
2534	98.058	2534	97.5249	2534	98.1539	2534	98.4397	2534	97.1054
2533	98.0803	2533	97.5024	2533	98.2429	2533	98.4946	2533	97.1587
2532	98.0975	2532	97.5414	2532	98.3013	2532	98.5131	2532	97.1994
2531	98.1332	2531	97.6366	2531	98.3225	2531	98.5409	2531	97.2331
2530	98.1622	2530	97.7284	2530	98.3046	2530	98.594	2530	97.2469
2529	98.1397	2529	97.754	2529	98.2442	2529	98.6135	2529	97.2234
2528	98.0834	2528	97.7169	2528	98.1652	2528	98.5692	2528	97.1794
2527	98.0547	2527	97.6661	2527	98.1057	2527	98.5156	2527	97.1469
2526	98.0685	2526	97.6275	2526	98.073	2526	98.5005	2526	97.1302
2525	98.084	2525	97.5993	2525	98.055	2525	98.5	2525	97.1211
2524	98.0745	2524	97.5944	2524	98.0615	2524	98.4825	2524	97.1345
2523	98.0436	2523	97.6291	2523	98.1044	2523	98.4598	2523	97.1818
2522	97.9849	2522	97.681	2522	98.1505	2522	98.4396	2522	97.2301
2521	97.8947	2521	97.7055	2521	98.1538	2521	98.398	2521	97.2366
2520	97.8192	2520	97.6904	2520	98.1258	2520	98.3345	2520	97.2088
2519	97.82	2519	97.6593	2519	98.1178	2519	98.2881	2519	97.1833
2518	97.8917	2518	97.6329	2518	98.1414	2518	98.274	2518	97.1623
2517	97.9675	2517	97.624	2517	98.1637	2517	98.2667	2517	97.1235
2516	98.0028	2516	97.6477	2516	98.1671	2516	98.2626	2516	97.0755
2515	98.0027	2515	97.6933	2515	98.1578	2515	98.2891	2515	97.0505
2514	97.9788	2514	97.7071	2514	98.1269	2514	98.3385	2514	97.0517
2513	97.9383	2513	97.6485	2513	98.0691	2513	98.3673	2513	97.0526
2512	97.9078	2512	97.5479	2512	98.0282	2512	98.3729	2512	97.0411
2511	97.9048	2511	97.463	2511	98.0559	2511	98.3939	2511	97.0232
2510	97.8935	2510	97.4026	2510	98.1256	2510	98.4222	2510	96.9976
2509	97.8257	2509	97.3394	2509	98.1494	2509	98.3999	2509	96.9673
2508	97.7193	2508	97.2748	2508	98.0827	2508	98.3187	2508	96.9564
2507	97.6425	2507	97.2387	2507	97.9649	2507	98.2424	2507	96.9748
2506	97.6313	2506	97.2392	2506	97.8615	2506	98.2124	2506	96.9909
2505	97.6718	2505	97.264	2505	97.8176	2505	98.2136	2505	96.9821
2504	97.744	2504	97.3163	2504	97.8498	2504	98.2394	2504	96.9827
2503	97.825	2503	97.4006	2503	97.9268	2503	98.3009	2503	97.03
2502	97.8684	2502	97.4861	2502	97.9712	2502	98.3563	2502	97.0895
2501	97.8464	2501	97.5321	2501	97.9401	2501	98.3301	2501	97.094
2500	97.8017	2500	97.5397	2500	97.8903	2500	98.2315	2500	97.0353
2499	97.7923	2499	97.5371	2499	97.9023	2499	98.1633	2499	96.9635
2498	97.8004	2498	97.5311	2498	97.962	2498	98.1821	2498	96.9172
2497	97.7637	2497	97.5145	2497	97.9869	2497	98.2317	2497	96.9064
2496	97.6861	2496	97.4998	2496	97.9541	2496	98.2431	2496	96.9359
2495	97.6413	2495	97.4971	2495	97.9201	2495	98.218	2495	96.9868
2494	97.6649	2494	97.481	2494	97.9197	2494	98.1787	2494	97.0003
2493	97.7102	2493	97.4291	2493	97.9228	2493	98.1201	2493	96.9478
2492	97.7222	2492	97.3679	2492	97.9011	2492	98.0508	2492	96.8929
2491	97.6994	2491	97.3321	2491	97.8687	2491	98.0142	2491	96.9114
2490	97.6725	2490	97.3031	2490	97.8438	2490	98.0309	2490	96.9739
2489	97.6664	2489	97.2472	2489	97.8258	2489	98.0714	2489	96.9824
2488	97.6868	2488	97.1882	2488	97.8161	2488	98.1064	2488	96.9097
2487	97.7074	2487	97.1798	2487	97.8142	2487	98.1297	2487	96.8245
2486	97.6793	2486	97.2208	2486	97.7953	2486	98.1209	2486	96.7858
2485	97.5874	2485	97.2585	2485	97.7397	2485	98.0534	2485	96.7929
2484	97.4828	2484	97.2669	2484	97.6764	2484	97.9538	2484	96.8355
2483	97.4222	2483	97.2645	2483	97.6466	2483	97.8866	2483	96.9146
2482	97.4051	2482	97.2634	2482	97.6384	2482	97.8705	2482	96.9975
2481	97.412	2481	97.2587	2481	97.6105	2481	97.8714	2481	97.0249
2480	97.4618	2480	97.2627	2480	97.5678	2480	97.8767	2480	96.9822
2479	97.5675	2479	97.294	2479	97.5506	2479	97.9044	2479	96.9121
2478	97.6683	2478	97.3369	2478	97.5658	2478	97.9398	2478	96.8467
2477	97.685	2477	97.3599	2477	97.588	2477	97.943	2477	96.7846
2476	97.6274	2476	97.367	2476	97.6179	2476	97.9262	2476	96.7359
2475	97.576	2475	97.3813	2475	97.6751	2475	97.9409	2475	96.7283
2474	97.565	2474	97.3867	2474	97.7373	2474	97.9812	2474	96.7565
2473	97.5538	2473	97.342	2473	97.7525	2473	97.9828	2473	96.7775
2472	97.5073	2472	97.2497	2472	97.7091	2472	97.928	2472	96.7715
2471	97.4368	2471	97.1632	2471	97.6388	2471	97.8686	2471	96.7597
2470	97.3653	2470	97.1268	2470	97.5602	2470	97.8345	2470	96.7527
2469	97.3109	2469	97.1445	2469	97.4796	2469	97.8026	2469	96.7288
2468	97.3029	2468	97.1945	2468	97.4344	2468	97.7646	2468	96.6756
2467	97.3559	2467	97.2354	2467	97.467	2467	97.7458	2467	96.6122
2466	97.4323	2466	97.214	2466	97.5602	2466	97.7456	2466	96.5626
2465	97.479	2465	97.1206	2465	97.6541	2465	97.7381	2465	96.5403
2464	97.4925	2464	97.0251	2464	97.7221	2464	97.741	2464	96.5564
2463	97.5011	2463	97.0104	2463	97.7742	2463	97.7952	2463	96.6056
2462	97.5009	2462	97.078	2462	97.7988	2462	97.8682	2462	96.6472
2461	97.4685	2461	97.1601	2461	97.7718	2461	97.8681	2461	96.6424
2460	97.4212	2460	97.2089	2460	97.7139	2460	97.7763	2460	96.6102
2459	97.3978	2459	97.2236	2459	97.6676	2459	97.6779	2459	96.6028
2458	97.3915	2458	97.2027	2458	97.6266	2458	97.6406	2458	96.6333
2457	97.3654	2457	97.1337	2457	97.5556	2457	97.6452	2457	96.6706
2456	97.3253	2456	97.031	2456	97.4728	2456	97.6555	2456	96.6933
2455	97.3124	2455	96.9361	2455	97.4359	2455	97.6688	2455	96.6988
2454	97.3312	2454	96.8775	2454	97.4455	2454	97.6728	2454	96.6668
2453	97.3447	2453	96.8626	2453	97.4384	2453	97.6363	2453	96.5768
2452	97.3412	2452	96.8994	2452	97.3877	2452	97.576	2452	96.4645
2451	97.3432	2451	96.981	2451	97.3366	2451	97.5578	2451	96.4001
2450	97.3562	2450	97.0608	2450	97.3206	2450	97.6023	2450	96.4011
2449	97.366	2449	97.0863	2449	97.3211	2449	97.6567	2449	96.4193
2448	97.3806	2448	97.0557	2448	97.3168	2448	97.6799	2448	96.421
2447	97.4139	2447	97.004	2447	97.3179	2447	97.6827	2447	96.4234
2446	97.4346	2446	96.949	2446	97.3316	2446	97.6683	2446	96.4409
2445	97.3962	2445	96.8966	2445	97.3468	2445	97.615	2445	96.4516
2444	97.3163	2444	96.8743	2444	97.3674	2444	97.5409	2444	96.4388
2443	97.2599	2443	96.9069	2443	97.4107	2443	97.5071	2443	96.4201
2442	97.2467	2442	96.9666	2442	97.4579	2442	97.5302	2442	96.4135
2441	97.2372	2441	97.0004	2441	97.4595	2441	97.5642	2441	96.4129
2440	97.2134	2440	96.997	2440	97.4019	2440	97.5849	2440	96.412
2439	97.2072	2439	96.9819	2439	97.3269	2439	97.6181	2439	96.4144
2438	97.2377	2438	96.9585	2438	97.2767	2438	97.6663	2438	96.4102
2437	97.2752	2437	96.9089	2437	97.2613	2437	97.69	2437	96.3782
2436	97.2802	2436	96.8431	2436	97.2767	2436	97.6806	2436	96.3269
2435	97.237	2435	96.7975	2435	97.3138	2435	97.6769	2435	96.2978
2434	97.1504	2434	96.7872	2434	97.3485	2434	97.6871	2434	96.3161
2433	97.0507	2433	96.8009	2433	97.3638	2433	97.672	2433	96.365
2432	96.9903	2432	96.8306	2432	97.3734	2432	97.6191	2432	96.4132
2431	96.9906	2431	96.8633	2431	97.3843	2431	97.5606	2431	96.4396
2430	97.0067	2430	96.8598	2430	97.3589	2430	97.5062	2430	96.4293
2429	96.9888	2429	96.7951	2429	97.2682	2429	97.4371	2429	96.3793
2428	96.9587	2428	96.7103	2428	97.1633	2428	97.3746	2428	96.3128
2427	96.9705	2427	96.6757	2427	97.1279	2427	97.3712	2427	96.2579
2426	97.0203	2426	96.708	2426	97.173	2426	97.419	2426	96.2146
2425	97.0592	2425	96.7629	2425	97.2388	2425	97.4492	2425	96.1715
2424	97.081	2424	96.7999	2424	97.291	2424	97.4407	2424	96.1462
2423	97.1233	2423	96.8136	2423	97.3448	2423	97.4454	2423	96.1691
2422	97.1852	2422	96.8133	2422	97.3964	2422	97.4876	2422	96.2264
2421	97.2144	2421	96.815	2421	97.4059	2421	97.5224	2421	96.2574
2420	97.1835	2420	96.8417	2420	97.3618	2420	97.518	2420	96.2195
2419	97.1191	2419	96.8898	2419	97.3001	2419	97.4981	2419	96.1284
2418	97.0495	2418	96.9103	2418	97.2444	2418	97.477	2418	96.0315
2417	96.9775	2417	96.8616	2417	97.1829	2417	97.4288	2417	95.9705
2416	96.9108	2416	96.7666	2416	97.1145	2416	97.3526	2416	95.9662
2415	96.8655	2415	96.6806	2415	97.0645	2415	97.2947	2415	96.0099
2414	96.8334	2414	96.6224	2414	97.0431	2414	97.278	2414	96.0608
2413	96.7903	2413	96.5794	2413	97.0332	2413	97.2731	2413	96.0784
2412	96.7434	2412	96.5527	2412	97.0297	2412	97.2605	2412	96.0591
2411	96.7283	2411	96.548	2411	97.0463	2411	97.257	2411	96.0269
2410	96.7532	2410	96.5417	2410	97.0726	2410	97.261	2410	95.9952
2409	96.7876	2409	96.5096	2409	97.0678	2409	97.2349	2409	95.9644
2408	96.8085	2408	96.4733	2408	97.0127	2408	97.17	2408	95.9441
2407	96.8206	2407	96.4715	2407	96.9355	2407	97.1083	2407	95.9449
2406	96.828	2406	96.4975	2406	96.8781	2406	97.0765	2406	95.9521
2405	96.8226	2405	96.5148	2405	96.8619	2405	97.0531	2405	95.9354
2404	96.8027	2404	96.5169	2404	96.8846	2404	97.0198	2404	95.889
2403	96.7736	2403	96.5227	2403	96.922	2403	96.9922	2403	95.8369
2402	96.7338	2402	96.5279	2402	96.9339	2402	96.9823	2402	95.8037
2401	96.6851	2401	96.5149	2401	96.8975	2401	96.9787	2401	95.7977
2400	96.6464	2400	96.4976	2400	96.8318	2400	96.9748	2400	95.8165
2399	96.6301	2399	96.5061	2399	96.7676	2399	96.9706	2399	95.8479
2398	96.6186	2398	96.5309	2398	96.7091	2398	96.9461	2398	95.8721
2397	96.592	2397	96.5316	2397	96.6515	2397	96.8841	2397	95.8802
2396	96.5628	2396	96.4954	2396	96.6151	2396	96.8185	2396	95.8816
2395	96.55	2395	96.4455	2395	96.6209	2395	96.804	2395	95.8795
2394	96.5421	2394	96.3961	2394	96.6515	2394	96.8379	2394	95.8543
2393	96.5195	2393	96.3451	2393	96.6731	2393	96.8696	2393	95.7963
2392	96.4967	2392	96.3033	2392	96.686	2392	96.8835	2392	95.7345
2391	96.5008	2391	96.2894	2391	96.7116	2391	96.9086	2391	95.7102
2390	96.5233	2390	96.2956	2390	96.7412	2390	96.9444	2390	95.7297
2389	96.5337	2389	96.2957	2389	96.7395	2389	96.9463	2389	95.7653
2388	96.5275	2388	96.2846	2388	96.6973	2388	96.8987	2388	95.7879
2387	96.5247	2387	96.2775	2387	96.6412	2387	96.8397	2387	95.7781
2386	96.5309	2386	96.2755	2386	96.5939	2386	96.7976	2386	95.7255
2385	96.5388	2385	96.2666	2385	96.5609	2385	96.7602	2385	95.6474
2384	96.5557	2384	96.2521	2384	96.5486	2384	96.7239	2384	95.5945
2383	96.5914	2383	96.2394	2383	96.5594	2383	96.7147	2383	95.6062
2382	96.6218	2382	96.2155	2382	96.5697	2382	96.7378	2382	95.6664
2381	96.6059	2381	96.1674	2381	96.5472	2381	96.755	2381	95.7221
2380	96.5425	2380	96.123	2380	96.4955	2380	96.7409	2380	95.7399
2379	96.4747	2379	96.126	2379	96.4506	2379	96.718	2379	95.7184
2378	96.4349	2378	96.1665	2378	96.4305	2378	96.7097	2378	95.6623
2377	96.4217	2377	96.1847	2377	96.4222	2377	96.7024	2377	95.5813
2376	96.429	2376	96.1562	2376	96.4178	2376	96.6861	2376	95.5081
2375	96.4563	2375	96.119	2375	96.4219	2375	96.6801	2375	95.4722
2374	96.4839	2374	96.0991	2374	96.4227	2374	96.6848	2374	95.4589
2373	96.4882	2373	96.0704	2373	96.4039	2373	96.6654	2373	95.4356
2372	96.4832	2372	96.0198	2372	96.3909	2372	96.6219	2372	95.4111
2371	96.4968	2371	95.9912	2371	96.4266	2371	96.6074	2371	95.4116
2370	96.5049	2370	96.0263	2370	96.4935	2370	96.6347	2370	95.4106
2369	96.4537	2369	96.1096	2369	96.5224	2369	96.6421	2369	95.3591
2368	96.3481	2368	96.2012	2368	96.4836	2368	96.5974	2368	95.2875
2367	96.2502	2367	96.2734	2367	96.4085	2367	96.5462	2367	95.2886
2366	96.1939	2366	96.2916	2366	96.3238	2366	96.5122	2366	95.3805
2365	96.1765	2365	96.2254	2365	96.2449	2365	96.464	2365	95.4637
2364	96.2102	2364	96.1032	2364	96.2123	2364	96.4205	2364	95.4421
2363	96.2938	2363	95.9899	2363	96.2425	2363	96.4585	2363	95.3237
2362	96.3554	2362	95.9068	2362	96.2579	2362	96.5673	2362	95.1757
2361	96.3272	2361	95.8413	2361	96.1734	2361	96.6285	2361	95.0635
2360	96.2519	2360	95.8121	2360	96.0406	2360	96.5866	2360	95.0391
2359	96.199	2359	95.8347	2359	95.9678	2359	96.5039	2359	95.0878
2358	96.1549	2358	95.8564	2358	95.9713	2358	96.4255	2358	95.1319
2357	96.0864	2357	95.826	2357	95.9996	2357	96.3454	2357	95.1141
2356	96.0391	2356	95.7942	2356	96.0457	2356	96.2962	2356	95.0671
2355	96.0704	2355	95.834	2355	96.1374	2355	96.3292	2355	95.0468
2354	96.1388	2354	95.9053	2354	96.237	2354	96.406	2354	95.0432
2353	96.1688	2353	95.9082	2353	96.2727	2353	96.4376	2353	95.0215
2352	96.1547	2352	95.8336	2352	96.2247	2352	96.4092	2352	94.9883
2351	96.1313	2351	95.7569	2351	96.1324	2351	96.3642	2351	94.9724
2350	96.0971	2350	95.7174	2350	96.0399	2350	96.3168	2350	94.9665
2349	96.0323	2349	95.6867	2349	95.9684	2349	96.2528	2349	94.9436
2348	95.9588	2348	95.6337	2348	95.9379	2348	96.1849	2348	94.9122
2347	95.9192	2347	95.5671	2347	95.9435	2347	96.1531	2347	94.9021
2346	95.9178	2346	95.5157	2346	95.9364	2346	96.1592	2346	94.9229
2345	95.9123	2345	95.4922	2345	95.8723	2345	96.1539	2345	94.9283
2344	95.8989	2344	95.4931	2344	95.7951	2344	96.1276	2344	94.8937
2343	95.9229	2343	95.5183	2343	95.7911	2343	96.1345	2343	94.8615
2342	95.9655	2342	95.5639	2342	95.8387	2342	96.1695	2342	94.8501
2341	95.954	2341	95.6126	2341	95.8452	2341	96.1502	2341	94.8213
2340	95.8732	2340	95.6466	2340	95.7816	2340	96.0575	2340	94.7508
2339	95.7795	2339	95.6539	2339	95.7032	2339	95.9754	2339	94.6748
2338	95.706	2338	95.6159	2338	95.6494	2338	95.9661	2338	94.631
2337	95.6422	2337	95.5255	2337	95.6123	2337	95.9938	2337	94.6259
2336	95.589	2336	95.4169	2336	95.5861	2336	96.0056	2336	94.6448
2335	95.5698	2335	95.3418	2335	95.5851	2335	95.9938	2335	94.6798
2334	95.5816	2334	95.3155	2334	95.6032	2334	95.9611	2334	94.7057
2333	95.606	2333	95.3134	2333	95.6287	2333	95.8966	2333	94.7028
2332	95.6447	2332	95.3119	2332	95.6772	2332	95.8242	2332	94.6656
2331	95.7018	2331	95.3074	2331	95.7652	2331	95.7931	2331	94.6194
2330	95.7366	2330	95.3023	2330	95.8505	2330	95.8093	2330	94.5791
2329	95.7008	2329	95.3031	2329	95.8538	2329	95.819	2329	94.5486
2328	95.6192	2328	95.3232	2328	95.7645	2328	95.7928	2328	94.5376
2327	95.5519	2327	95.3544	2327	95.6324	2327	95.7486	2327	94.5471
2326	95.5169	2326	95.3581	2326	95.5031	2326	95.6983	2326	94.5556
2325	95.49	2325	95.3099	2325	95.3977	2325	95.6387	2325	94.5386
2324	95.468	2324	95.2467	2324	95.3438	2324	95.593	2324	94.5054
2323	95.4724	2323	95.2335	2323	95.3692	2323	95.6026	2323	94.4901
2322	95.485	2322	95.2838	2322	95.438	2322	95.6551	2322	94.493
2321	95.4625	2321	95.3511	2321	95.4827	2321	95.6829	2321	94.4927
2320	95.4055	2320	95.397	2320	95.4842	2320	95.6584	2320	94.485
2319	95.3573	2319	95.4173	2319	95.4757	2319	95.6121	2319	94.4987
2318	95.3259	2318	95.4073	2318	95.4602	2318	95.5599	2318	94.5359
2317	95.2892	2317	95.3589	2317	95.4104	2317	95.4888	2317	94.5713
2316	95.2611	2316	95.2902	2316	95.3399	2316	95.4257	2316	94.5802
2315	95.2808	2315	95.2278	2315	95.2943	2315	95.4234	2315	94.5585
2314	95.3374	2314	95.1711	2314	95.2786	2314	95.4765	2314	94.5021
2313	95.3713	2313	95.1106	2313	95.2541	2313	95.5169	2313	94.4256
2312	95.3595	2312	95.0708	2312	95.2163	2312	95.5147	2312	94.3702
2311	95.3349	2311	95.0849	2311	95.2061	2311	95.503	2311	94.3694
2310	95.3217	2310	95.1395	2310	95.2387	2310	95.4984	2310	94.4026
2309	95.3083	2309	95.1901	2309	95.2827	2309	95.4752	2309	94.4266
2308	95.289	2308	95.2201	2308	95.3206	2308	95.4345	2308	94.4316
2307	95.2693	2307	95.235	2307	95.3618	2307	95.4118	2307	94.4319
2306	95.2346	2306	95.2176	2306	95.3919	2306	95.4063	2306	94.4166
2305	95.1729	2305	95.1469	2305	95.3754	2305	95.3806	2305	94.3666
2304	95.1206	2304	95.051	2304	95.3167	2304	95.3431	2304	94.2984
2303	95.1315	2303	94.9858	2303	95.2671	2303	95.3494	2303	94.2546
2302	95.1983	2302	94.9695	2302	95.2541	2302	95.4101	2302	94.2413
2301	95.2631	2301	94.9851	2301	95.2574	2301	95.4676	2301	94.2312
2300	95.2964	2300	95.0332	2300	95.2563	2300	95.4839	2300	94.21
2299	95.3132	2299	95.1219	2299	95.2533	2299	95.4752	2299	94.192
2298	95.3161	2298	95.2106	2298	95.25	2298	95.4552	2298	94.1855
2297	95.2889	2297	95.2328	2297	95.2468	2297	95.4184	2297	94.1892
2296	95.2472	2296	95.1825	2296	95.2693	2296	95.3926	2296	94.2075
2295	95.2263	2295	95.1196	2295	95.3324	2295	95.4145	2295	94.2321
2294	95.2229	2294	95.0833	2294	95.3854	2294	95.4424	2294	94.2265
2293	95.2038	2293	95.0565	2293	95.349	2293	95.3851	2293	94.1736
2292	95.1735	2292	95.0187	2292	95.218	2292	95.2403	2292	94.1263
2291	95.1659	2291	94.9749	2291	95.0667	2291	95.1139	2291	94.1507
2290	95.1769	2290	94.9221	2290	94.9558	2290	95.0791	2290	94.2361
2289	95.1726	2289	94.8422	2289	94.8934	2289	95.1085	2289	94.3103
2288	95.1607	2288	94.741	2288	94.8816	2288	95.1655	2288	94.3362
2287	95.1791	2287	94.6516	2287	94.9348	2287	95.2593	2287	94.331
2286	95.2162	2286	94.597	2286	95.0381	2286	95.3729	2286	94.3071
2285	95.2194	2285	94.5871	2285	95.151	2285	95.44	2285	94.2644
2284	95.1827	2284	94.6345	2284	95.2578	2284	95.4407	2284	94.2332
2283	95.147	2283	94.72	2283	95.3574	2283	95.4261	2283	94.2446
2282	95.1193	2282	94.7647	2282	95.4104	2282	95.4155	2282	94.2636
2281	95.08	2281	94.7192	2281	95.3793	2281	95.3763	2281	94.2289
2280	95.0551	2280	94.6593	2280	95.3062	2280	95.3281	2280	94.1596
2279	95.0787	2279	94.6972	2279	95.2586	2279	95.337	2279	94.1381
2278	95.0982	2278	94.8143	2278	95.2129	2278	95.3792	2278	94.1929
2277	95.0386	2277	94.8909	2277	95.1051	2277	95.3542	2277	94.2859
2276	94.9485	2276	94.8909	2276	94.9737	2276	95.267	2276	94.4009
2275	94.9461	2275	94.894	2275	94.9216	2275	95.2361	2275	94.5403
2274	95.029	2274	94.9408	2274	94.9494	2274	95.2875	2274	94.6402
2273	95.0762	2273	94.9741	2273	94.9636	2273	95.3125	2273	94.6148
2272	95.0362	2272	94.9492	2272	94.9474	2272	95.2662	2272	94.4954
2271	94.967	2271	94.8876	2271	94.9781	2271	95.2257	2271	94.407
2270	94.8958	2270	94.813	2270	95.0657	2270	95.2117	2270	94.4021
2269	94.8023	2269	94.7469	2269	95.1234	2269	95.1554	2269	94.4274
2268	94.7405	2268	94.7539	2268	95.1144	2268	95.091	2268	94.4453
2267	94.8049	2267	94.8658	2267	95.0845	2267	95.1604	2267	94.4697
2266	94.9613	2266	94.9725	2266	95.0379	2266	95.3617	2266	94.4785
2265	95.0648	2265	94.9257	2265	94.9299	2265	95.5005	2265	94.4158
2264	95.0643	2264	94.7485	2264	94.7892	2264	95.4653	2264	94.2924
2263	95.0334	2263	94.5983	2263	94.702	2263	95.3474	2263	94.1691
2262	95.0064	2262	94.548	2262	94.6816	2262	95.2341	2262	94.0531
2261	94.9609	2261	94.5539	2261	94.6982	2261	95.1166	2261	93.9221
2260	94.9467	2260	94.6015	2260	94.8002	2260	95.0378	2260	93.8276
2259	95.0384	2259	94.7138	2259	95.0363	2259	95.0877	2259	93.8537
2258	95.1578	2258	94.8214	2258	95.2818	2258	95.2019	2258	93.9905
2257	95.1299	2257	94.8064	2257	95.3372	2257	95.1963	2257	94.1583
2256	94.9325	2256	94.6903	2256	95.2067	2256	95.0632	2256	94.3178
2255	94.7073	2255	94.6072	2255	95.0759	2255	94.9794	2255	94.4421
2254	94.5287	2254	94.5855	2254	95.0086	2254	94.9779	2254	94.4407
2253	94.363	2253	94.5364	2253	94.8835	2253	94.8988	2253	94.2865
2252	94.2383	2252	94.4503	2252	94.6364	2252	94.7193	2252	94.1473
2251	94.2393	2251	94.4161	2251	94.353	2251	94.6248	2251	94.1973
2250	94.3336	2250	94.4445	2250	94.1147	2250	94.6893	2250	94.3578
2249	94.3943	2249	94.4641	2249	93.9553	2249	94.7817	2249	94.4096
2248	94.4016	2248	94.4925	2248	93.9544	2248	94.855	2248	94.3105
2247	94.4405	2247	94.6224	2247	94.1786	2247	95.026	2247	94.1883
2246	94.5134	2246	94.8274	2246	94.5199	2246	95.284	2246	94.0727
2245	94.5543	2245	94.9638	2245	94.7732	2245	95.4236	2245	93.8804
2244	94.6005	2244	94.9727	2244	94.8926	2244	95.3748	2244	93.6391
2243	94.7308	2243	94.9053	2243	94.9821	2243	95.2939	2243	93.4828
2242	94.8633	2242	94.7676	2242	95.048	2242	95.2455	2242	93.4303
2241	94.8583	2241	94.5556	2241	95.0015	2241	95.1256	2241	93.3875
2240	94.7853	2240	94.4008	2240	94.8814	2240	94.9698	2240	93.3587
2239	94.8214	2239	94.4467	2239	94.8188	2239	94.9774	2239	93.4264
2238	94.9247	2238	94.6074	2238	94.8003	2238	95.1302	2238	93.5205
2237	94.8979	2237	94.6793	2237	94.7201	2237	95.1327	2237	93.4613
2236	94.7508	2236	94.6799	2236	94.6394	2236	94.8574	2236	93.2711
2235	94.6918	2235	94.8052	2235	94.7245	2235	94.5184	2235	93.1951
2234	94.7699	2234	95.0426	2234	94.9317	2234	94.3126	2234	93.3693
2233	94.8362	2233	95.1238	2233	95.0284	2233	94.236	2233	93.6767
2232	94.8539	2232	94.9198	2232	94.9436	2232	94.2996	2232	93.9585
2231	94.9276	2231	94.5987	2231	94.836	2231	94.5592	2231	94.1543
2230	95.015	2230	94.3441	2230	94.8113	2230	94.8509	2230	94.2008
2229	94.9498	2229	94.1868	2229	94.8427	2229	94.8902	2229	94.0606
2228	94.774	2228	94.1318	2228	94.9311	2228	94.7475	2228	93.8913
2227	94.7098	2227	94.2009	2227	95.0727	2227	94.7844	2227	93.9222
2226	94.7722	2226	94.3129	2226	95.1088	2226	95.0299	2226	94.134
2225	94.7346	2225	94.3482	2225	94.9128	2225	95.0806	2225	94.275
2224	94.5316	2224	94.3616	2224	94.6872	2224	94.7688	2224	94.2179
2223	94.3795	2223	94.4958	2223	94.7261	2223	94.442	2223	94.0729
2222	94.4493	2222	94.6964	2222	94.9523	2222	94.4101	2222	93.943
2221	94.7143	2221	94.7809	2221	95.0471	2221	94.6044	2221	93.8326
2220	95.1174	2220	94.7658	2220	94.9815	2220	94.9131	2220	93.7849
2219	95.5987	2219	94.8056	2219	95.0196	2219	95.392	2219	93.8533
2218	95.9281	2218	94.8369	2218	95.2043	2218	95.9171	2218	93.9348
2217	95.8465	2217	94.6462	2217	95.2761	2217	96.0881	2217	93.8783
2216	95.4357	2216	94.2877	2216	95.1448	2216	95.7615	2216	93.7541
2215	95.0107	2215	94.0628	2215	95.0162	2215	95.2467	2215	93.7576
2214	94.6969	2214	94.0747	2214	94.9924	2214	94.8199	2214	93.8909
2213	94.4474	2213	94.136	2213	94.9498	2213	94.4994	2213	94.007
2212	94.3324	2212	94.1269	2212	94.8299	2212	94.3228	2212	94.097
2211	94.4466	2211	94.1178	2211	94.6871	2211	94.3686	2211	94.2241
2210	94.6159	2210	94.1138	2210	94.4626	2210	94.4382	2210	94.2409
2209	94.5915	2209	94.0515	2209	94.1077	2209	94.2121	2209	93.9614
2208	94.4897	2208	94.0637	2208	93.8799	2208	93.8411	2208	93.569
2207	94.6272	2207	94.3746	2207	94.103	2207	93.8306	2207	93.4318
2206	94.9879	2206	94.8875	2206	94.6732	2206	94.274	2206	93.5683
2205	95.2698	2205	95.2063	2205	95.1598	2205	94.7187	2205	93.671
2204	95.4004	2204	95.1432	2204	95.4072	2204	94.9077	2204	93.635
2203	95.5355	2203	94.8562	2203	95.6173	2203	95.0637	2203	93.6655
2202	95.5789	2202	94.4753	2202	95.8211	2202	95.2506	2202	93.8226
2201	95.2702	2201	94.0318	2201	95.8168	2201	95.1572	2201	93.8836
2200	94.755	2200	93.7123	2200	95.6388	2200	94.7474	2200	93.7406
2199	94.49	2199	93.7458	2199	95.5339	2199	94.4347	2199	93.5432
2198	94.593	2198	94.0247	2198	95.4645	2198	94.3968	2198	93.3798
2197	94.757	2197	94.2118	2197	95.1722	2197	94.346	2197	93.1891
2196	94.7776	2196	94.2688	2196	94.7324	2196	94.1531	2196	93.0199
2195	94.6984	2195	94.4565	2195	94.511	2195	94.0907	2195	93.0454
2194	94.4588	2194	94.766	2194	94.5723	2194	94.2591	2194	93.2835
2193	93.982	2193	94.8463	2193	94.6484	2193	94.4089	2193	93.5924
2192	93.561	2192	94.5932	2192	94.6773	2192	94.5031	2192	93.9479
2191	93.58	2191	94.3035	2191	94.8427	2191	94.7893	2191	94.3871
2190	93.9031	2190	94.1625	2190	95.0607	2190	95.1351	2190	94.6783
2189	94.0406	2189	94.0767	2189	95.0259	2189	95.0197	2189	94.5191
2188	93.9353	2188	94.055	2188	94.8443	2188	94.4588	2188	94.1004
2187	94.0011	2187	94.2857	2187	94.9749	2187	94.1183	2187	93.9323
2186	94.3361	2186	94.6961	2186	95.4462	2186	94.2828	2186	94.1274
2185	94.5548	2185	94.8824	2185	95.7365	2185	94.4959	2185	94.3429
2184	94.5053	2184	94.6866	2184	95.623	2184	94.483	2184	94.4222
2183	94.4771	2183	94.3676	2183	95.4952	2183	94.6208	2183	94.554
2182	94.554	2182	94.0881	2182	95.617	2182	95.0819	2182	94.6971
2181	94.4918	2181	93.7866	2181	95.7868	2181	95.415	2181	94.4842
2180	94.3083	2180	93.5721	2180	95.8383	2180	95.4034	2180	93.8829
2179	94.2945	2179	93.7031	2179	95.834	2179	95.4625	2179	93.3365
2178	94.4001	2178	94.1079	2178	95.6637	2178	95.7788	2178	93.1509
2177	94.2826	2177	94.3776	2177	95.123	2177	95.9276	2177	93.2095
2176	94.0022	2176	94.3685	2176	94.4598	2176	95.7058	2176	93.2936
2175	93.9623	2175	94.3295	2175	94.1736	2175	95.4705	2175	93.3288
2174	94.1596	2174	94.3488	2174	94.2828	2174	95.3401	2174	93.2879
2173	94.1891	2173	94.2489	2173	94.3478	2173	94.9521	2173	93.2715
2172	94.0149	2172	94.0457	2172	94.226	2172	94.2895	2172	93.6265
2171	94.0404	2171	93.9655	2171	94.2118	2171	93.8781	2171	94.5324
2170	94.3774	2170	93.9801	2170	94.3757	2170	93.9314	2170	95.4955
2169	94.7101	2169	93.8566	2169	94.4177	2169	94.0695	2169	95.7364
2168	94.9346	2168	93.6922	2168	94.2768	2168	94.1151	2168	95.1937
2167	95.3004	2167	93.8386	2167	94.2791	2167	94.4235	2167	94.4963
2166	95.7809	2166	94.2399	2166	94.5326	2166	95.0759	2166	93.991
2165	95.9785	2165	94.4099	2165	94.7336	2165	95.541	2165	93.5182
2164	95.8258	2164	94.2214	2164	94.7399	2164	95.6115	2164	93.05
2163	95.6366	2163	94.0612	2163	94.7839	2163	95.8052	2163	92.8795
2162	95.3498	2162	94.0409	2162	94.9706	2162	96.3143	2162	93.0687
2161	94.6413	2161	93.8718	2161	95.1396	2161	96.5158	2161	93.276
2160	93.8466	2160	93.6779	2160	95.2781	2160	96.1127	2160	93.3472
2159	93.7156	2159	94.0419	2159	95.422	2159	95.6949	2159	93.5016
2158	94.1753	2158	94.8945	2158	95.2357	2158	95.5446	2158	93.7166
2157	94.4485	2157	95.3533	2157	94.5979	2157	95.2508	2157	93.7079
2156	94.3704	2156	95.1064	2156	94.1134	2156	94.7824	2156	93.5439
2155	94.3613	2155	94.7363	2155	94.177	2155	94.5186	2155	93.4565
2154	94.407	2154	94.6058	2154	94.3315	2154	94.3602	2154	93.2959
2153	94.2063	2153	94.5043	2153	94.1451	2153	93.9375	2153	92.8482
2152	93.9381	2152	94.2621	2152	94.0184	2152	93.4535	2152	92.3797
2151	94.0207	2151	94.0221	2151	94.4443	2151	93.3745	2151	92.2972
2150	94.3724	2150	93.883	2150	95.0251	2150	93.5667	2150	92.525
2149	94.5992	2149	93.7649	2149	95.0123	2149	93.5564	2149	92.6863
2148	94.7288	2148	93.6639	2148	94.4884	2148	93.5188	2148	92.7256
2147	95.0494	2147	93.6704	2147	94.1276	2147	94.0399	2147	92.8654
2146	95.3487	2146	93.7435	2146	94.0616	2146	94.9637	2146	93.0638
2145	95.0905	2145	93.7774	2145	93.877	2145	95.3976	2145	93.0667
2144	94.3031	2144	93.8395	2144	93.511	2144	95.0148	2144	92.9259
2143	93.5528	2143	94.01	2143	93.3561	2143	94.3911	2143	92.9504
2142	93.1558	2142	94.0825	2142	93.5405	2142	93.984	2142	93.207
2141	93.0098	2141	93.7968	2141	93.7657	2141	93.7046	2141	93.4782
2140	93.0156	2140	93.2827	2140	93.8482	2140	93.4605	2140	93.6505
2139	93.1791	2139	92.8917	2139	93.8947	2139	93.3816	2139	93.7766
2138	93.3288	2138	92.725	2138	93.9219	2138	93.3863	2138	93.7991
2137	93.2206	2137	92.6398	2137	93.8122	2137	93.1689	2137	93.6069
2136	92.9621	2136	92.598	2136	93.6448	2136	92.7731	2136	93.3265
2135	92.8815	2135	92.7025	2135	93.6041	2135	92.5993	2135	93.197
2134	93.0128	2134	92.9224	2134	93.5991	2134	92.7582	2134	93.217
2133	93.1015	2133	93.0872	2133	93.387	2133	92.9333	2133	93.1935
2132	93.0565	2132	93.1378	2132	93.0159	2132	92.9321	2132	93.0569
2131	93.0259	2131	93.13	2131	92.7633	2131	92.9036	2131	92.8759
2130	93.0607	2130	93.054	2130	92.7258	2130	92.9569	2130	92.662
2129	93.0425	2129	92.8793	2129	92.7714	2129	92.9962	2129	92.3993
2128	92.9362	2128	92.6987	2128	92.8161	2128	92.9754	2128	92.171
2127	92.8402	2127	92.6305	2127	92.8872	2127	92.98	2127	92.0619
2126	92.7863	2126	92.639	2126	92.9522	2126	93.0136	2126	92.0131
2125	92.715	2125	92.6222	2125	92.9381	2125	92.9916	2125	91.936
2124	92.6424	2124	92.6143	2124	92.8992	2124	92.9632	2124	91.8868
2123	92.6515	2123	92.7157	2123	92.9408	2123	93.0605	2123	91.9531
2122	92.7223	2122	92.872	2122	93.0035	2122	93.2166	2122	92.0473
2121	92.7476	2121	92.9161	2121	92.9408	2121	93.2076	2121	92.0164
2120	92.7173	2120	92.8199	2120	92.7881	2120	93.0079	2120	91.9034
2119	92.7146	2119	92.7182	2119	92.7296	2119	92.8294	2119	91.882
2118	92.7405	2118	92.6862	2118	92.8166	2118	92.7935	2118	91.9693
2117	92.7196	2117	92.6717	2117	92.932	2117	92.8336	2117	92.0214
2116	92.672	2116	92.6383	2116	93.0174	2116	92.9288	2116	91.9997
2115	92.7041	2115	92.6074	2115	93.1201	2115	93.1498	2115	92.0247
2114	92.8224	2114	92.5551	2114	93.2039	2114	93.4164	2114	92.1419
2113	92.9118	2113	92.4342	2113	93.1431	2113	93.4943	2113	92.2372
2112	92.9168	2112	92.3119	2112	92.9432	2112	93.3359	2112	92.238
2111	92.8881	2111	92.3199	2111	92.7564	2111	93.1579	2111	92.2139
2110	92.8469	2110	92.4583	2110	92.652	2110	93.1033	2110	92.2172
2109	92.7687	2109	92.5979	2109	92.5728	2109	93.0978	2109	92.195
2108	92.6932	2108	92.688	2108	92.5257	2108	93.0961	2108	92.123
2107	92.6801	2107	92.7928	2107	92.5986	2107	93.1819	2107	92.078
2106	92.675	2106	92.9023	2106	92.759	2106	93.3361	2106	92.1193
2105	92.5891	2105	92.8982	2105	92.8483	2105	93.3899	2105	92.2158
2104	92.4814	2104	92.7535	2104	92.8226	2104	93.3088	2104	92.318
2103	92.475	2103	92.5947	2103	92.7858	2103	93.2421	2103	92.3892
2102	92.5335	2102	92.528	2102	92.7537	2102	93.213	2102	92.3655
2101	92.5278	2101	92.5461	2101	92.6219	2101	93.062	2101	92.226
2100	92.483	2100	92.613	2100	92.4096	2100	92.7808	2100	92.0905
2099	92.534	2099	92.7013	2099	92.3095	2099	92.6006	2099	92.0952
2098	92.6617	2098	92.7409	2098	92.4409	2098	92.6535	2098	92.1981
2097	92.7032	2097	92.6865	2097	92.7225	2097	92.8138	2097	92.2563
2096	92.6238	2096	92.6333	2096	93.0229	2096	92.9596	2096	92.2578
2095	92.548	2095	92.7058	2095	93.2648	2095	93.1228	2095	92.2959
2094	92.5256	2094	92.8574	2094	93.3596	2094	93.2798	2094	92.352
2093	92.505	2093	92.9467	2093	93.2579	2093	93.2963	2093	92.3256
2092	92.5197	2092	92.9626	2092	93.0894	2092	93.1815	2092	92.2461
2091	92.6659	2091	92.9884	2091	93.0444	2091	93.1153	2091	92.2386
2090	92.8983	2090	92.9965	2090	93.1243	2090	93.1624	2090	92.3018
2089	93.0531	2089	92.8912	2089	93.1805	2089	93.209	2089	92.3181
2088	93.078	2088	92.7251	2088	93.1693	2088	93.2105	2088	92.2731
2087	93.0499	2087	92.6557	2087	93.1676	2087	93.2398	2087	92.2707
2086	92.9853	2086	92.6937	2086	93.1608	2086	93.2593	2086	92.3282
2085	92.8549	2085	92.7034	2085	93.0545	2085	93.1441	2085	92.3507
2084	92.7549	2084	92.6565	2084	92.9027	2084	92.9789	2084	92.3116
2083	92.8276	2083	92.6745	2083	92.8872	2083	93.0144	2083	92.2727
2082	93.0203	2082	92.7902	2082	93.0454	2082	93.2694	2082	92.2237
2081	93.1388	2081	92.8779	2081	93.2308	2081	93.4768	2081	92.1046
2080	93.149	2080	92.8722	2080	93.3629	2080	93.505	2080	91.9923
2079	93.1951	2079	92.8613	2079	93.5004	2079	93.5054	2079	92.0511
2078	93.3231	2078	92.9045	2078	93.6361	2078	93.5462	2078	92.2764
2077	93.4445	2077	92.9409	2077	93.6737	2077	93.4771	2077	92.4836
2076	93.5622	2076	92.9282	2076	93.6426	2076	93.2831	2076	92.5729
2075	93.7488	2075	92.8982	2075	93.67	2075	93.1806	2075	92.5994
2074	93.8973	2074	92.8487	2074	93.714	2074	93.2187	2074	92.5736
2073	93.8048	2073	92.7685	2073	93.6059	2073	93.1671	2073	92.4527
2072	93.5253	2072	92.766	2072	93.3778	2072	92.9577	2072	92.3317
2071	93.3192	2071	92.959	2071	93.2524	2071	92.854	2071	92.3658
2070	93.2572	2070	93.238	2070	93.2918	2070	93.0168	2070	92.4932
2069	93.1999	2069	93.3597	2069	93.3535	2069	93.2836	2069	92.5027
2068	93.1489	2068	93.2891	2068	93.397	2068	93.5322	2068	92.3953
2067	93.2682	2067	93.2028	2067	93.527	2067	93.8789	2067	92.3798
2066	93.5236	2066	93.1731	2066	93.6991	2066	94.3043	2066	92.4945
2065	93.6571	2065	93.1404	2065	93.7302	2065	94.4984	2065	92.5604
2064	93.6002	2064	93.162	2064	93.6603	2064	94.3458	2064	92.5551
2063	93.5485	2063	93.362	2063	93.7269	2063	94.1408	2063	92.6735
2062	93.5794	2062	93.6314	2062	93.9426	2062	94.1129	2062	92.944
2061	93.5881	2061	93.71	2061	94.0787	2061	94.1757	2061	93.1471
2060	93.6007	2060	93.5929	2060	94.0806	2060	94.2605	2060	93.1996
2059	93.7602	2059	93.5101	2059	94.1189	2059	94.474	2059	93.2605
2058	93.979	2058	93.4939	2058	94.2028	2058	94.757	2058	93.3625
2057	94.0016	2057	93.3476	2057	94.161	2057	94.827	2057	93.3161
2056	93.8589	2056	93.068	2056	94.0453	2056	94.6472	2056	93.1119
2055	93.8396	2055	92.9079	2055	94.1124	2055	94.4906	2055	93.0435
2054	93.9789	2054	92.9587	2054	94.3408	2054	94.4043	2054	93.2812
2053	94.0193	2053	93.0431	2053	94.4115	2053	94.1215	2053	93.6337
2052	93.9267	2052	93.0945	2052	94.2629	2052	93.6501	2052	93.876
2051	93.9783	2051	93.2841	2051	94.1847	2051	93.4043	2051	94.002
2050	94.2441	2050	93.6507	2050	94.2573	2050	93.575	2050	93.989
2049	94.4361	2049	93.965	2049	94.1966	2049	93.8481	2049	93.6933
2048	94.4468	2048	94.1614	2048	93.9517	2048	94.003	2048	93.2064
2047	94.5434	2047	94.4898	2047	93.9018	2047	94.2731	2047	92.9136
2046	94.7804	2046	94.9751	2046	94.1628	2046	94.6924	2046	93.0086
2045	94.8572	2045	95.251	2045	94.3341	2045	94.8193	2045	93.3021
2044	94.7627	2044	95.1965	2044	94.2427	2044	94.5773	2044	93.6086
2043	94.8566	2043	95.1456	2043	94.259	2043	94.5378	2043	93.955
2042	95.1489	2042	95.2444	2042	94.5784	2042	94.9768	2042	94.2675
2041	95.2126	2041	95.2163	2041	94.8589	2041	95.4361	2041	94.3647
2040	95.0042	2040	94.9801	2040	94.8876	2040	95.5791	2040	94.3899
2039	95.0073	2039	94.8745	2039	94.9511	2039	95.6824	2039	94.6627
2038	95.3693	2038	95.0575	2038	95.209	2038	95.8513	2038	95.0105
2037	95.67	2037	95.2632	2037	95.3845	2037	95.7214	2037	94.9062
2036	95.7076	2036	95.3308	2036	95.3581	2036	95.3307	2036	94.4393
2035	95.7308	2035	95.4363	2035	95.3749	2035	95.2663	2035	94.3575
2034	95.6919	2034	95.5915	2034	95.39	2034	95.585	2034	94.9462
2033	95.2486	2033	95.5552	2033	95.0126	2033	95.6211	2033	95.5783
2032	94.6656	2032	95.4137	2032	94.3557	2032	95.2619	2032	95.6799
2031	94.6691	2031	95.5505	2031	94.052	2031	95.2149	2031	95.4449
2030	95.3624	2030	95.9443	2030	94.3167	2030	95.6951	2030	95.2197
2029	96.0798	2029	96.1482	2029	94.7269	2029	96.0552	2029	95.0278
2028	96.3977	2028	96.0351	2028	94.9931	2028	95.997	2028	94.8975
2027	96.4969	2027	95.869	2027	95.2687	2027	95.9831	2027	94.9846
2026	96.3709	2026	95.6727	2026	95.4959	2026	96.086	2026	95.2397
2025	95.8011	2025	95.3233	2025	95.3072	2025	95.7617	2025	95.4669
2024	95.1421	2024	95.0884	2024	94.78	2024	95.0848	2024	95.7499
2023	95.0416	2023	95.315	2023	94.4029	2023	94.8693	2023	96.2477
2022	95.4733	2022	95.7384	2022	94.2832	2022	95.3626	2022	96.6049
2021	95.8476	2021	95.8123	2021	94.174	2021	95.9187	2021	96.3243
2020	96.0127	2020	95.6343	2020	94.1689	2020	96.1533	2020	95.6649
2019	96.3085	2019	95.7244	2019	94.6329	2019	96.3505	2019	95.3065
2018	96.5694	2018	96.0064	2018	95.3856	2018	96.4107	2018	95.3375
2017	96.2093	2017	95.9717	2017	95.7152	2017	95.7754	2017	95.3519
2016	95.4403	2016	95.7736	2016	95.4558	2016	94.7675	2016	95.3394
2015	95.1242	2015	96.0537	2015	95.098	2015	94.4088	2015	95.6434
2014	95.4585	2014	96.735	2014	94.8311	2014	94.8609	2014	96.0828
2013	95.8393	2013	96.9755	2013	94.5143	2013	95.286	2013	96.0335
2012	95.9162	2012	96.386	2012	94.3414	2012	95.3112	2012	95.4317
2011	95.9234	2011	95.4268	2011	94.6826	2011	95.4702	2011	94.8169
2010	95.8892	2010	94.5534	2010	95.3281	2010	95.9073	2010	94.4277
2009	95.5341	2009	93.922	2009	95.5962	2009	95.9655	2009	94.0924
2008	95.0726	2008	93.7975	2008	95.3648	2008	95.5055	2008	93.888
2007	95.1058	2007	94.4487	2007	95.1543	2007	95.3007	2007	94.1409
2006	95.6423	2006	95.5539	2006	95.1268	2006	95.6528	2006	94.715
2005	96.0746	2005	96.3188	2005	95.0038	2005	95.9308	2005	95.0309
2004	96.1763	2004	96.4402	2004	94.8596	2004	95.8354	2004	94.9374
2003	96.2663	2003	96.2574	2003	95.0747	2003	95.863	2003	94.8175
2002	96.385	2002	95.9657	2002	95.5713	2002	96.1955	2002	94.8598
[truncated: 1,352 more rows]
