# Supplementary material for: Bimetallic nanoparticles and biochar produced by Adansonia Digitata shell and their effect against tomato pathogenic fungi
Source: PeerJ. 2024 Mar 1;12:e17023. doi: 10.7717/peerj.17023 (PMC10911075; doi:10.7717/peerj.17023)
Supplement: Supplemental Information 2 [file peerj-12-17023-s002.xlsx]

## Sheet: Sheet1
	Treatmeants
fungal species	control				AgNPs				FeONPs				Ag-FeONPs				Biochar
Alternaria sp.	3.607	4.247	4.347	4.075	0	0	0	0	2.623	2.595	3.174	2.68	0	0	0	0	4.443	7.286	7.665	6.56
Sclerotinia sclerotiorum	6.37	6.321	6.365	6.378	0	0	0	0	5.439	4.896	4.962	5.224	0	0	0	0	6.602	6.66	6.036	6.549
Fusarium venenatum	2.1	2.134	2.175	2.163	0	0	0	0	2.334	2.111	2.153	2.418	0	0	0	0	2.118	2.04	2.324	2.319
Fusarium equiseti	2.663	2.363	2.583	2.626	1.177	1.357	1.13	1.084	2.212	2.116	2.208	2.124	0	0	0	0	3.059	3.188	2.842	3.115
