# Supplementary material for: Bimetallic nanoparticles and biochar produced by Adansonia Digitata shell and their effect against tomato pathogenic fungi
Source: PeerJ. 2024 Mar 1;12:e17023. doi: 10.7717/peerj.17023 (PMC10911075; doi:10.7717/peerj.17023)
Supplement: Supplemental Information 3 [file peerj-12-17023-s003.xlsx]

## Sheet: LSD analysis
Within each row, compare columns (simple effects within rows)
Number of families	4												Table Analyzed	Data 3
Number of comparisons per family	10
Alpha	0.05												Two-way ANOVA	Ordinary
													Alpha	0.05
Uncorrected Fisher's LSD	Mean Diff.	95.00% CI of diff.	Below threshold?	Summary	Individual P Value
													Source of Variation	% of total variation	P value	P value summary	Significant?
Alternaria sp.													Interaction	17.31	<0.0001	****	Yes
control vs. AgNPs	4.069	3.569 to 4.569	Yes	****	<0.0001							Fungal strain	Row Factor	14.54	<0.0001	****	Yes
control vs. FeONPs	1.301	0.8011 to 1.801	Yes	****	<0.0001							Treatments	Column Factor	66.34	<0.0001	****	Yes
control vs. Ag-FeONPs	4.069	3.569 to 4.569	Yes	****	<0.0001
control vs. Biochar	-2.42	-2.919 to -1.920	Yes	****	<0.0001								ANOVA table	SS	DF	MS	F (DFn, DFd)	P value
AgNPs vs. FeONPs	-2.768	-3.268 to -2.268	Yes	****	<0.0001								Interaction	71.65	12	5.971	F (12, 60) = 47.81	P<0.0001
AgNPs vs. Ag-FeONPs	0	-0.4999 to 0.4999	No	ns	>0.9999								Row Factor	60.2	3	20.07	F (3, 60) = 160.7	P<0.0001
AgNPs vs. Biochar	-6.489	-6.988 to -5.989	Yes	****	<0.0001								Column Factor	274.6	4	68.65	F (4, 60) = 549.7	P<0.0001
FeONPs vs. Ag-FeONPs	2.768	2.268 to 3.268	Yes	****	<0.0001								Residual	7.493	60	0.1249
FeONPs vs. Biochar	-3.721	-4.220 to -3.221	Yes	****	<0.0001
Ag-FeONPs vs. Biochar	-6.489	-6.988 to -5.989	Yes	****	<0.0001								Data summary
													Number of columns (Column Factor)	5
Sclerotinia sclerotiorum													Number of rows (Row Factor)	4
control vs. AgNPs	6.359	5.859 to 6.858	Yes	****	<0.0001								Number of values	80
control vs. FeONPs	1.228	0.7284 to 1.728	Yes	****	<0.0001
control vs. Ag-FeONPs	6.359	5.859 to 6.858	Yes	****	<0.0001
control vs. Biochar	-0.1033	-0.6031 to 0.3966	No	ns	0.6809
AgNPs vs. FeONPs	-5.13	-5.630 to -4.630	Yes	****	<0.0001
AgNPs vs. Ag-FeONPs	0	-0.4999 to 0.4999	No	ns	>0.9999
AgNPs vs. Biochar	-6.462	-6.962 to -5.962	Yes	****	<0.0001
FeONPs vs. Ag-FeONPs	5.13	4.630 to 5.630	Yes	****	<0.0001
FeONPs vs. Biochar	-1.332	-1.831 to -0.8316	Yes	****	<0.0001
Ag-FeONPs vs. Biochar	-6.462	-6.962 to -5.962	Yes	****	<0.0001
Fusarium venenatum
control vs. AgNPs	2.143	1.643 to 2.643	Yes	****	<0.0001
control vs. FeONPs	-0.111	-0.6109 to 0.3889	No	ns	0.6585
control vs. Ag-FeONPs	2.143	1.643 to 2.643	Yes	****	<0.0001
control vs. Biochar	-0.05725	-0.5571 to 0.4426	No	ns	0.8196
AgNPs vs. FeONPs	-2.254	-2.754 to -1.754	Yes	****	<0.0001
AgNPs vs. Ag-FeONPs	0	-0.4999 to 0.4999	No	ns	>0.9999
AgNPs vs. Biochar	-2.2	-2.700 to -1.700	Yes	****	<0.0001
FeONPs vs. Ag-FeONPs	2.254	1.754 to 2.754	Yes	****	<0.0001
FeONPs vs. Biochar	0.05375	-0.4461 to 0.5536	No	ns	0.8304
Ag-FeONPs vs. Biochar	-2.2	-2.700 to -1.700	Yes	****	<0.0001
Fusarium equiseti
control vs. AgNPs	1.372	0.8719 to 1.872	Yes	****	<0.0001
control vs. FeONPs	0.3938	-0.1061 to 0.8936	No	ns	0.1204
control vs. Ag-FeONPs	2.559	2.059 to 3.059	Yes	****	<0.0001
control vs. Biochar	-0.4923	-0.9921 to 0.007608	No	ns	0.0535
AgNPs vs. FeONPs	-0.978	-1.478 to -0.4781	Yes	***	0.0002
AgNPs vs. Ag-FeONPs	1.187	0.6871 to 1.687	Yes	****	<0.0001
AgNPs vs. Biochar	-1.864	-2.364 to -1.364	Yes	****	<0.0001
FeONPs vs. Ag-FeONPs	2.165	1.665 to 2.665	Yes	****	<0.0001
FeONPs vs. Biochar	-0.886	-1.386 to -0.3861	Yes	***	0.0008
Ag-FeONPs vs. Biochar	-3.051	-3.551 to -2.551	Yes	****	<0.0001
Test details	Mean 1	Mean 2	Mean Diff.	SE of diff.	N1	N2	t	DF
Alternaria sp.
control vs. AgNPs	4.069	0	4.069	0.2499	4	4	16.28	60
control vs. FeONPs	4.069	2.768	1.301	0.2499	4	4	5.206	60
control vs. Ag-FeONPs	4.069	0	4.069	0.2499	4	4	16.28	60
control vs. Biochar	4.069	6.489	-2.42	0.2499	4	4	9.682	60
AgNPs vs. FeONPs	0	2.768	-2.768	0.2499	4	4	11.08	60
AgNPs vs. Ag-FeONPs	0	0	0	0.2499	4	4	0	60
AgNPs vs. Biochar	0	6.489	-6.489	0.2499	4	4	25.97	60
FeONPs vs. Ag-FeONPs	2.768	0	2.768	0.2499	4	4	11.08	60
FeONPs vs. Biochar	2.768	6.489	-3.721	0.2499	4	4	14.89	60
Ag-FeONPs vs. Biochar	0	6.489	-6.489	0.2499	4	4	25.97	60
Sclerotinia sclerotiorum
control vs. AgNPs	6.359	0	6.359	0.2499	4	4	25.45	60
control vs. FeONPs	6.359	5.13	1.228	0.2499	4	4	4.915	60
control vs. Ag-FeONPs	6.359	0	6.359	0.2499	4	4	25.45	60
control vs. Biochar	6.359	6.462	-0.1033	0.2499	4	4	0.4132	60
AgNPs vs. FeONPs	0	5.13	-5.13	0.2499	4	4	20.53	60
AgNPs vs. Ag-FeONPs	0	0	0	0.2499	4	4	0	60
AgNPs vs. Biochar	0	6.462	-6.462	0.2499	4	4	25.86	60
FeONPs vs. Ag-FeONPs	5.13	0	5.13	0.2499	4	4	20.53	60
FeONPs vs. Biochar	5.13	6.462	-1.332	0.2499	4	4	5.328	60
Ag-FeONPs vs. Biochar	0	6.462	-6.462	0.2499	4	4	25.86	60
Fusarium venenatum
control vs. AgNPs	2.143	0	2.143	0.2499	4	4	8.576	60
control vs. FeONPs	2.143	2.254	-0.111	0.2499	4	4	0.4442	60
control vs. Ag-FeONPs	2.143	0	2.143	0.2499	4	4	8.576	60
control vs. Biochar	2.143	2.2	-0.05725	0.2499	4	4	0.2291	60
AgNPs vs. FeONPs	0	2.254	-2.254	0.2499	4	4	9.02	60
AgNPs vs. Ag-FeONPs	0	0	0	0.2499	4	4	0	60
AgNPs vs. Biochar	0	2.2	-2.2	0.2499	4	4	8.805	60
FeONPs vs. Ag-FeONPs	2.254	0	2.254	0.2499	4	4	9.02	60
FeONPs vs. Biochar	2.254	2.2	0.05375	0.2499	4	4	0.2151	60
Ag-FeONPs vs. Biochar	0	2.2	-2.2	0.2499	4	4	8.805	60
Fusarium equiseti
control vs. AgNPs	2.559	1.187	1.372	0.2499	4	4	5.489	60
control vs. FeONPs	2.559	2.165	0.3938	0.2499	4	4	1.576	60
control vs. Ag-FeONPs	2.559	0	2.559	0.2499	4	4	10.24	60
control vs. Biochar	2.559	3.051	-0.4923	0.2499	4	4	1.97	60
AgNPs vs. FeONPs	1.187	2.165	-0.978	0.2499	4	4	3.914	60
AgNPs vs. Ag-FeONPs	1.187	0	1.187	0.2499	4	4	4.75	60
AgNPs vs. Biochar	1.187	3.051	-1.864	0.2499	4	4	7.459	60
FeONPs vs. Ag-FeONPs	2.165	0	2.165	0.2499	4	4	8.664	60
FeONPs vs. Biochar	2.165	3.051	-0.886	0.2499	4	4	3.546	60
Ag-FeONPs vs. Biochar	0	3.051	-3.051	0.2499	4	4	12.21	60
